# Supplementary material
Source: Research Square preprint supplement (doi:10.21203/rs.3.rs-8426026/v1)
Supplement: Supplementary file 1 [file a74f60eabb06815dcc1d28b4.docx]

**eMaterials**

**Figure S1.** Distribution of the PRSAD in the main cohort.

**Table S1.** Demographic information per PRSAD

**Table S2.** Demographic information for the EMIF-AD cohort at baseline.

**Table S3.** Likelihood ratio test results between age and age by *APOE* interaction models

**Figure S2.** Comparison between GAM and GAMLSS.

**Table S4.** Likelihood ratio test results between age and age by *APOE* interaction models, with *APOE* as an ordinal variable

**Figure S3.** Plasma concentrations over age, stratified by *APOE* ε4 carriership.

**Table S5.** Likelihood ratio test results between age and age by *APOE* interaction models within a non-related subset of the population

**Table S6.** Likelihood ratio test results between age and age by *APOE* interaction models in males and females

**Figure S4.** Comparison between GAM and GAMLSS in males

**Figure S5.** Comparison between GAM and GAMLSS in females

**Table S7.** Likelihood ratio test results between age and age by *APOE* interaction models, stratified by sex, with *APOE* as an ordinal variable

**Figure S6.** Plasma concentrations over age in males, stratified by *APOE* ε4 carriership

**Figure S7.** Plasma concentrations over age in females, stratified by *APOE* ε4 carriership

**Table S8.** Likelihood ratio test results between age and age by PRSAD interaction models, without adjusting for *APOE*

**Table S9.** Likelihood ratio test results between age and age by PRSAD interaction models, adjusting for *APOE*

**Table S10.** Likelihood ratio test results between age and age by PRSAD interaction models in males and females, without adjusting for *APOE*

**Table S11.** Likelihood ratio test results between age and age by PRSAD interaction models in males and females, adjusting for *APOE*

**Figure S8.** Concentrations of biomarkers over age, stratified by PRSAD

**Figure S9.** Concentrations of plasma biomarkers over age in males and females, stratified by PRSAD

**Table S12.** Likelihood ratio test results between age and age by PRSAD interaction models within a non-related subset of the population, without adjusting for APOE

**Figure S10.** Biomarker concentrations over age in the NTR and EMIF-AD sub-cohorts, by *APOE* ε4

**Figure S11.** Biomarker concentrations over age in the NTR and EMIF-AD sub-cohorts with underlying longitudinal population, by *APOE* ε4

**Table S13.** Comparison of *APOE* ε4 carriership LMMs in the EMIF-AD cohort

**Figure S12.** Biomarker concentrations over age in the NTR and EMIF-AD sub-cohorts, by *APOE* ε4 and Aβ PET status

**Table S14.** Comparison of *APOE* ε4 carriership and Aβ PET LMMs in the EMIF-AD cohort

**Figure S13.** Quality of p-tau217 duplicate measurements

**Figure S14.** Workflow of the statistical analysis in the main cohort


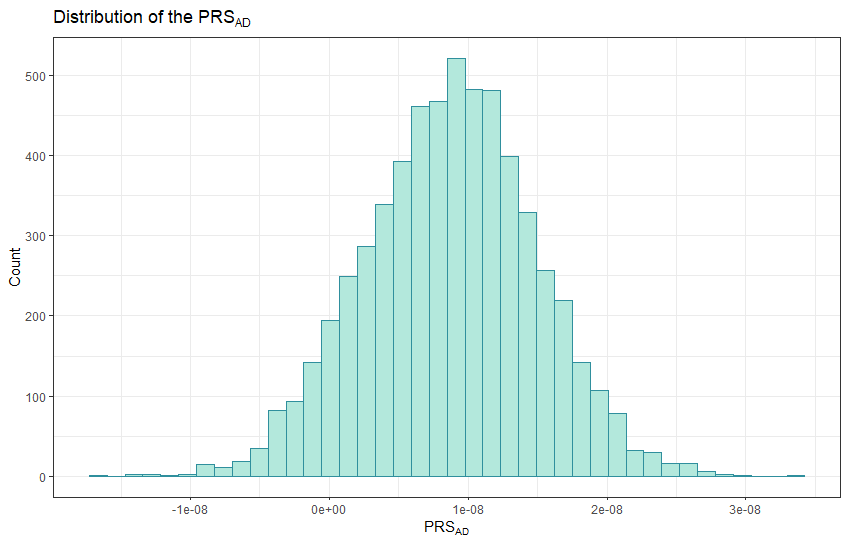


**Figure S1.** Distribution of the PRSAD in the main cohort. The PRSAD was distributed close to normally and was not transformed for analysis.

| **Table S1. Demographic information per PRSAD group.** | | | | |
| --- | --- | --- | --- | --- |
|  | *Low PRSAD* | *Medium PRSAD* | *High PRSAD* | *Group difference* |
| *n* | 1971 | 1971 | 1971 |  |
| *Age* [year]  Mean [range] | 49.6 [30 – 80] | 49.8 [30 – 80] | 50.0 [30 – 80] | 0.68± |
| *APOE ε4 carrier*  Carriers (%) | 589 (29.8%) | 561 (28.6%) | 615 (31.1%) | 0.17± |
| *Sex*  Female (%) | 1278 (64.9%) | 1256 (63.7%) | 1259 (64.1%) | 0.73* |
| *BMI*  Mean (SD) | 25.8 (4.2) | 25.6 (4.1) | 25.7 (4.3) | 0.63 |
| *eGFR*  Mean (SD) | 81.3 (14.7) | 81.3 (14.4) | 81.1 (14.8) | 0.92 |
| *p-tau217 pg/mL*  Mean (SD) | 0.029 (0.021) | 0.031 (0.022) | 0.031 (0.026) | 0.03± |
| *Aβ-42/40*  Mean (SD) | 0.067 (0.018) | 0.067 (0.020) | 0.067 (0.016) | 0.53± |
| *NfL pg/mL*  Mean (SD) | 9.72 (8.26) | 9.91 (9.81) | 10.1 (10.8) | 0.46± |
| *GFAP pg/mL*  Mean (SD) | 65.7 (37.9) | 68.3 (52.0) | 70.8 (72.4) | 0.02± |

± ANOVA, followed by Tukey HSD test if significant ; * Chi-square

Aβ-42/40: amyloid-β-42/40; GFAP: glial fibrillary acidic protein; NfL: neurofilament light; p-tau217: phosphorylated tau-217; PRSAD: Alzheimer’s disease polygenic risk score.

| **Table S2. Demographic information for the EMIF-AD cohort at baseline.** | | | |
| --- | --- | --- | --- |
|  | *ε4 non-carriers* | *ε4 carriers* | *Group difference* |
| *n* | 135 | 66 |  |
| *Age* [year]  Mean [range] | 72.2 [61 – 94] | 67.5 [60 – 83] | **< 0.001±** |
| *Sex* [-]  Female (%) | 86 (63.7%) | 30 (45.5%) | 0.02* |
| MMSE score  Median [range] | 29 [24 – 30] | 29 [25 – 30] | 0.30**±** |
| *Aβ PET status*  Aβ+, % | 20 (14.8%) | 26 (39.4%) | **< 0.001*** |
| *p-tau217* [pg/mL]  Mean (SD) | 0.041 (0.024) | 0.047 (0.031) | 0.14± |
| *Aβ-42/40* [-]  Mean (SD) | 0.061 (0.011) | 0.060 (0.012) | 0.63± |
| *NfL* [pg/mL]  Mean (SD) | 18.0 (9.52) | 15.4 (10.7) | 0.09± |
| *GFAP* [pg/mL]  Mean (SD) | 115 (55.6) | 112 (71.0) | 0.79± |

± t-test ; * Chi-square

Aβ-42/40: amyloid-β-42/40; GFAP: glial fibrillary acidic protein; NfL: neurofilament light; p-tau217: phosphorylated tau-217.

| **Table S3. Likelihood ratio test results between age and age by *APOE* interaction models.** | | | | | |
| --- | --- | --- | --- | --- | --- |
| ***Biomarker*** | ***Predictor*** | ***Deviance*** | ***df*** | ***LRT*** | ***p*** |
| *p-tau217* | Age | -33357.0 | 36.4 |  |  |
| Age + *APOE* | -33374.4 | 37.5 | 17.5 | **< 0.001** |
| Age + *APOE* + Age * *APOE* | -33424.8 | 43.4 | 50.3 | **< 0.001** |
| *Aβ-42/40* | Age | -33559.7 | 31.1 |  |  |
| Age + *APOE* | -33578.7 | 32.2 | 20.0 | **< 0.001** |
| Age + *APOE* + Age * *APOE* | -33612.9 | 36.9 | 33.2 | **< 0.001** |
| *NfL* | Age | 29751.3 | 44.5 |  |  |
| Age + *APOE* | 29751.2 | 45.5 | 0.06 | 0.81 |
| Age + *APOE* + Age * *APOE* | 29747.6 | 51.8 | 3.65 | 0.76 |
| *GFAP* | Age | 53659.1 | 38.5 |  |  |
| Age + *APOE* | 53657.8 | 39.5 | 1.26 | 0.26 |
| Age + *APOE* + Age * *APOE* | 53639.3 | 45.9 | 18.5 | **0.007** |

All models include principal components 1 to 20 as additional predictors and are adjusted for body mass index and estimated glomerular filtration rate.

*APOE* is modelled as a binary variable: *APOE* ε4 non-carrier (0) or *APOE* ε4 carrier (1).

The Age + *APOE* model is compared to the Age model. The Age + *APOE* + Age * APOE model is compared to the Age + *APOE* model. Age * *APOE* indicates an interaction effect between age and *APOE*.


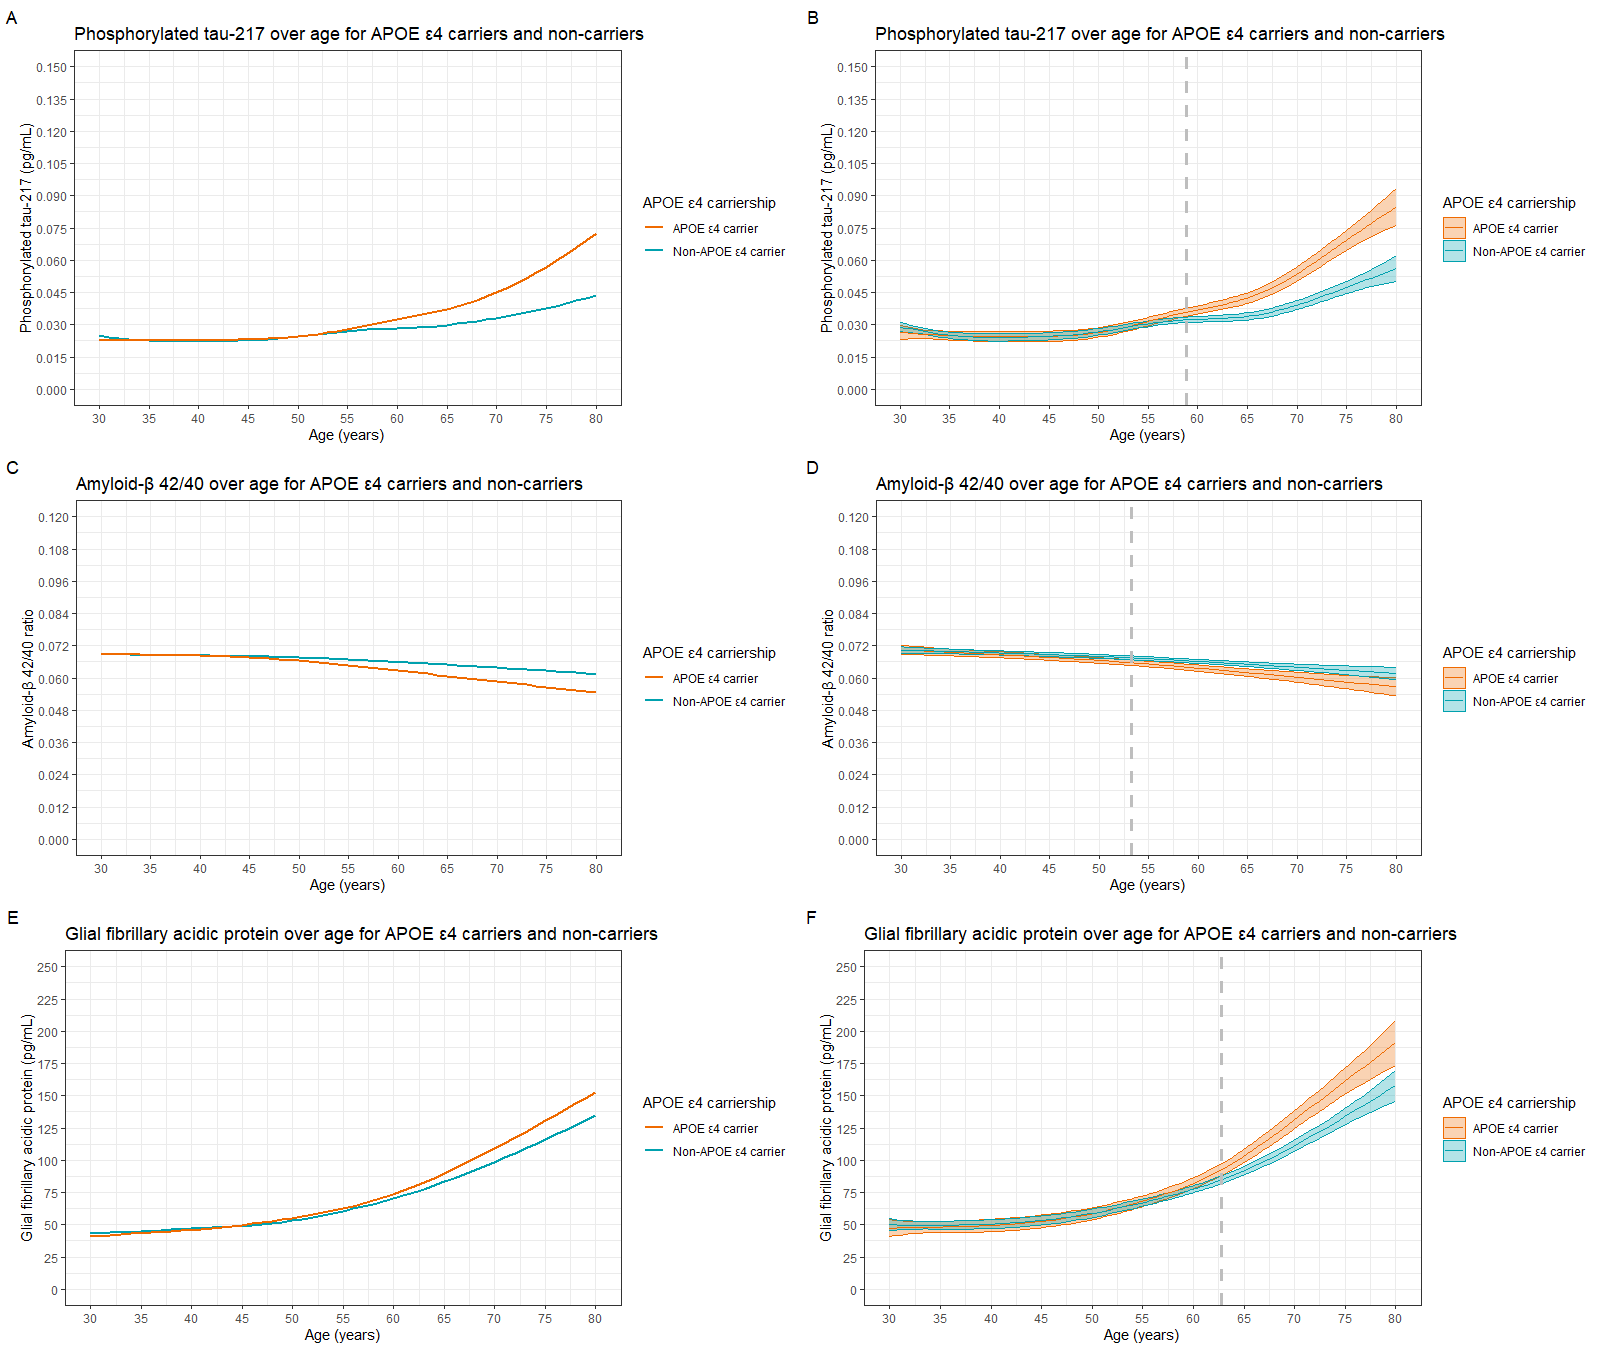


**Figure S2.** Comparison between GAMLSS (left) and GAM (right) approach. The GAMLSS approach was used as the basis for the main results. Grey vertical dashed lines represent the age at which the biomarker concentrations begin to significantly differ between *APOE* ε4 carriers and non-carriers. A and B = Phorphorylated-tau-217 over age. C and D = Amyloid-β-42/40 over age. E and F = Glial fibrillary acidic protein over age. Results for neurofilament light are not shown as no differences in concentrations were found between *APOE* ε4 carriers and non-carriers.

| **Table S4. Likelihood ratio test results between age and age by *APOE* interaction models, with *APOE* as an ordinal variable** | | | | | |
| --- | --- | --- | --- | --- | --- |
| ***Biomarker*** | ***Predictor*** | ***Deviance*** | ***df*** | ***LRT*** | ***p*** |
| *p-tau217* | Age | -33357.0 | 36.4 |  |  |
| Age + *APOE* | -33382.1 | 38.5 | 25.1 | **< 0.001** |
| Age + *APOE* + Age * *APOE* | -33441.8 | 47.6 | 59.7 | **< 0.001** |
| *Aβ-42/40* | Age | -33559.7 | 31.1 |  |  |
| Age + *APOE* | -33584.2 | 33.2 | 24.6 | **< 0.001** |
| Age + *APOE* + Age * *APOE* | -33625.5 | 38.8 | 41.2 | **< 0.001** |
| *NfL* | Age | 29751.3 | 44.5 |  |  |
| Age + *APOE* | 29747.0 | 46.5 | 4.30 | 0.12 |
| Age + *APOE* + Age * *APOE* | 29734.9 | 55.7 | 12.1 | 0.22 |
| *GFAP* | Age | 53659.1 | 38.5 |  |  |
| Age + *APOE* | 53655.0 | 40.6 | 4.06 | 0.14 |
| Age + *APOE* + Age * *APOE* | 53630.9 | 49.9 | 24.1 | **0.005** |

All models include principal components 1 to 20 as additional predictors and are adjusted for body mass index and estimated glomerular filtration rate.

*APOE* is modelled as a binary variable: *APOE* ε4 non-carrier (0), heterozygous *APOE* ε4 carrier (1), or homozygous *APOE* ε4 carrier (2).

The Age + *APOE* model is compared to the Age model. The Age + *APOE* + Age * *APOE* model is compared to the Age + *APOE* model. Age * *APOE* indicates an interaction effect between age and *APOE*.

| **Table S5. Likelihood ratio test results between age and age by *APOE* interaction models within a non-related subset of the population.** | | | | | |
| --- | --- | --- | --- | --- | --- |
| ***Biomarker*** | ***Predictor*** | ***Deviance*** | ***df*** | ***LRT*** | ***p*** |
| *p-tau217* | Age | -20589.8 | 35.0 |  |  |
| Age + *APOE* | -20600.3 | 36.0 | 10.5 | **0.001** |
| Age + *APOE* + Age * *APOE* | -20632.8 | 41.2 | 32.6 | **< 0.001** |
| *Aβ-42/40* | Age | -20531.6 | 30.8 |  |  |
| Age + *APOE* | -20551.3 | 31.9 | 19.7 | **< 0.001** |
| Age + *APOE* + Age * *APOE* | -20565.4 | 36.3 | 14.1 | **0.009** |
| *NfL* | Age | 18551.4 | 42.0 |  |  |
| Age + *APOE* | 18550.7 | 43.0 | 0.72 | 0.40 |
| Age + *APOE* + Age * *APOE* | 18546.1 | 49.1 | 4.60 | 0.61 |
| *GFAP* | Age | 32978.2 | 34.9 |  |  |
| Age + *APOE* | 32977.5 | 35.9 | 0.71 | 0.39 |
| Age + *APOE* + Age * *APOE* | 32961.6 | 42.6 | 15.9 | 0.02 |

All models include principal components 1 to 20 as additional predictors and are adjusted for body mass index and estimated glomerular filtration rate.

*APOE* is modelled as a binary variable: *APOE* ε4 non-carrier (0) or *APOE* ε4 carrier (1).

The Age + *APOE* model is compared to the Age model. The Age + *APOE* + Age * *APOE* model is compared to the Age + *APOE* model. Age * *APOE* indicates an interaction effect between age and *APOE*.


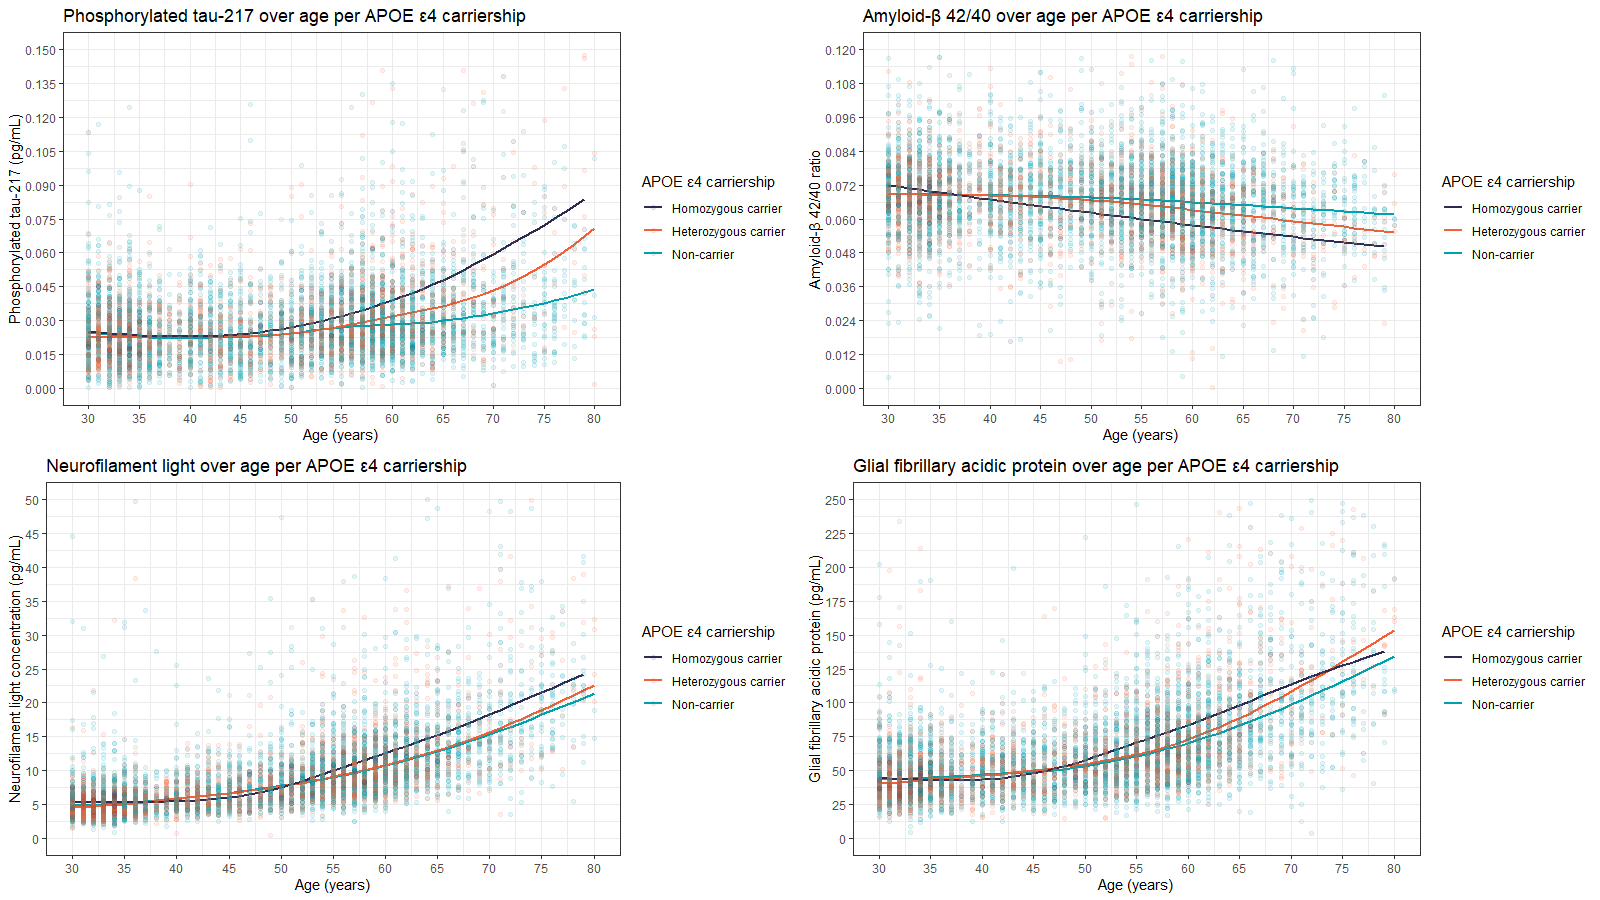


**Figure S3.** Plasma concentrations over age, stratified by *APOE* ε4 carriership. A = Phosphorylated-tau-217. B = Amyloid-β-42/40. C = Neurofilament light. D = Glial fibrillary acidic protein.

| **Table S6. Likelihood ratio test results between age and age by PRSAD interaction models within a non-related subset of the population, without adjusting for *APOE*.** | | | | | |
| --- | --- | --- | --- | --- | --- |
| ***Biomarker*** | ***Predictor*** | ***Deviance*** | ***df*** | ***LRT*** | ***p-value*** |
| *p-tau217* | Age | -20589.8 | 35.0 |  |  |
| Age + PRSAD | -20596.8 | 36.0 | 7.03 | **0.008** |
| Age + PRSAD + Age * PRSAD | -20596.9 | 37.0 | 0.07 | 0.78 |
| *Aβ-42/40* | Age | -20531.6 | 30.8 |  |  |
| Age + PRSAD | -20531.7 | 31.8 | 0.08 | 0.78 |
| Age + PRSAD + Age * PRSAD | -20532.7 | 33.3 | 1.05 | 0.46 |
| *NfL* | Age | 18551.4 | 42.0 |  |  |
| Age + PRSAD | 18551.1 | 43.0 | 0.23 | 0.63 |
| Age + PRSAD + Age * PRSAD | 18550.8 | 44.0 | 0.32 | 0.57 |
| *GFAP* | Age | 32978.2 | 34.9 |  |  |
| Age + PRSAD | 32977.7 | 36.0 | 0.57 | 0.46 |
| Age + PRSAD + Age * PRSAD | 32977.7 | 37.0 | -0 | NA |

All models include principal components 1 to 20 as additional predictors and are adjusted for body mass index and estimated glomerular filtration rate.

PRSAD is modelled as an ordinal variable: low AD genetic risk (0), medium AD genetic risk (1), high AD genetic risk (2).

The Age + PRSAD model is compared to the Age model. The Age + PRSAD + Age * PRSAD model is compared to the Age + PRSAD model. Age * PRSAD indicates an interaction effect between age and PRSAD.

| **Table S7. Likelihood ratio test results between age and age by *APOE* interaction models, stratified by sex, with *APOE* as an ordinal variable.** | | | | | | |
| --- | --- | --- | --- | --- | --- | --- |
| ***Biomarker*** | ***Sex*** | ***Predictor*** | ***Deviance*** | ***df*** | ***LRT*** | ***p*** |
| *p-tau217* | Males | Age | -11862.3 | 32.6 |  |  |
| Age + *APOE* | -11869.2 | 33.6 | 6.89 | **0.009** |
| Age + *APOE* + Age * *APOE* | -11905.1 | 38.5 | 35.9 | **< 0.001** |
| Females | Age | -21787.9 | 38.6 |  |  |
| Age + *APOE* | -21796.4 | 39.6 | 8.51 | **0.004** |
| Age + *APOE* + Age * *APOE* | -21806.1 | 43.4 | 9.63 | 0.04 |
| *Aβ-42/40* | Males | Age | -12011.0 | 28.2 |  |  |
| Age + *APOE* | -12021.5 | 29.2 | 10.5 | **0.001** |
| Age + *APOE* + Age * *APOE* | -12036.8 | 33.2 | 15.3 | **0.004** |
| Females | Age | -21595.6 | 30.7 |  |  |
| Age + *APOE* | -21606.4 | 31.8 | 10.9 | **0.001** |
| Age + *APOE* + Age * *APOE* | -21622.5 | 36.2 | 16.1 | **0.004** |
| *NfL* | Males | Age | 11095.7 | 37.0 |  |  |
| Age + *APOE* | 11093.8 | 38.0 | 1.89 | 0.17 |
| Age + *APOE* + Age * *APOE* | 11088.4 | 43.6 | 5.36 | 0.44 |
| Females | Age | 18517.9 | 43.9 |  |  |
| Age + *APOE* | 18517.3 | 44.9 | 0.67 | 0.41 |
| Age + *APOE* + Age * *APOE* | 18516.3 | 50.3 | 0.99 | 0.98 |
| *GFAP* | Males | Age | 19192.8 | 33.3 |  |  |
| Age + *APOE* | 19192.3 | 34.3 | 0.57 | 0.43 |
| Age + *APOE* + Age * *APOE* | 19177.4 | 40.0 | 14.8 | 0.02 |
| Females | Age | 34336.2 | 37.5 |  |  |
| Age + *APOE* | 34335.7 | 38.4 | 0.53 | 0.46 |
| Age + *APOE* + Age * *APOE* | 34330.1 | 44.3 | 5.62 | 0.45 |

All models include principal components 1 to 20 as additional predictors and are adjusted for body mass index and estimated glomerular filtration rate.

*APOE* is modelled as a binary variable: *APOE* ε4 non-carrier (0) or *APOE* ε4 carrier (1).

The Age + *APOE* model is compared to the Age model. The Age + *APOE* + Age * *APOE* model is compared to the Age + *APOE* model. Age * *APOE* indicates an interaction effect between age and *APOE*.


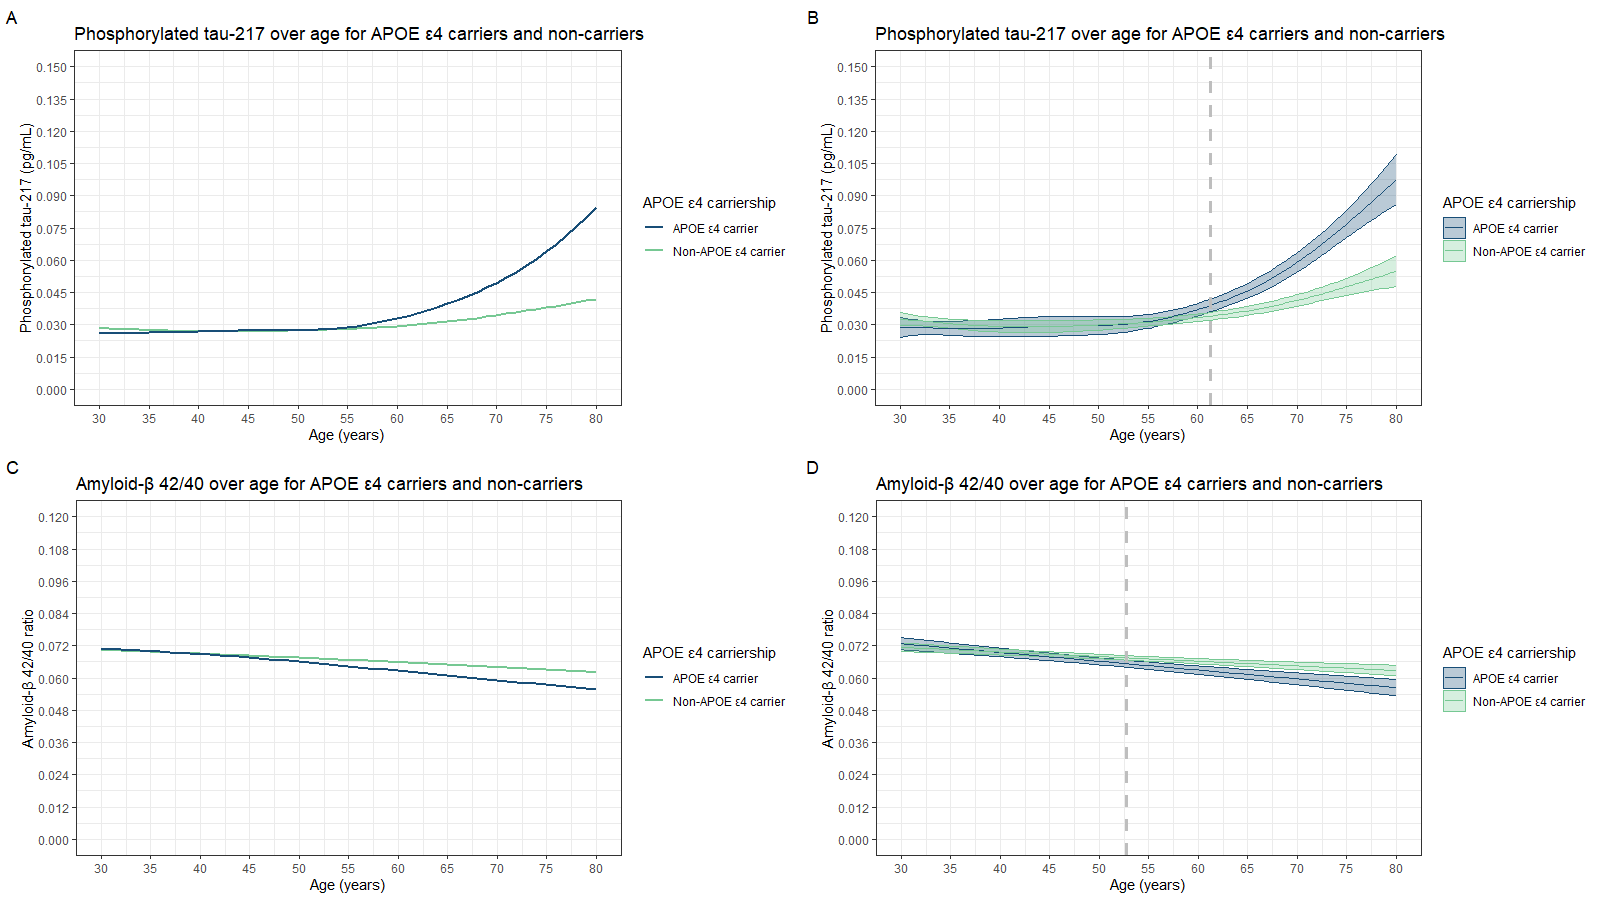


**Figure S4.** Comparison between GAMLSS (left) and GAM (right) approach. The GAMLSS approach was used as the basis for the main results. Grey vertical dashed lines represent the age at which the biomarker concentrations begin to significantly differ between *APOE* ε4 carriers and non-carriers. A and B = Phorphorylated-tau-217 over age. C and D = Amyloid-β-42/40 over age. Results for neurofilament light and glial fibrillary acidic protein are not shown as no differences in concentrations were found between *APOE* ε4 carriers and non-carriers.


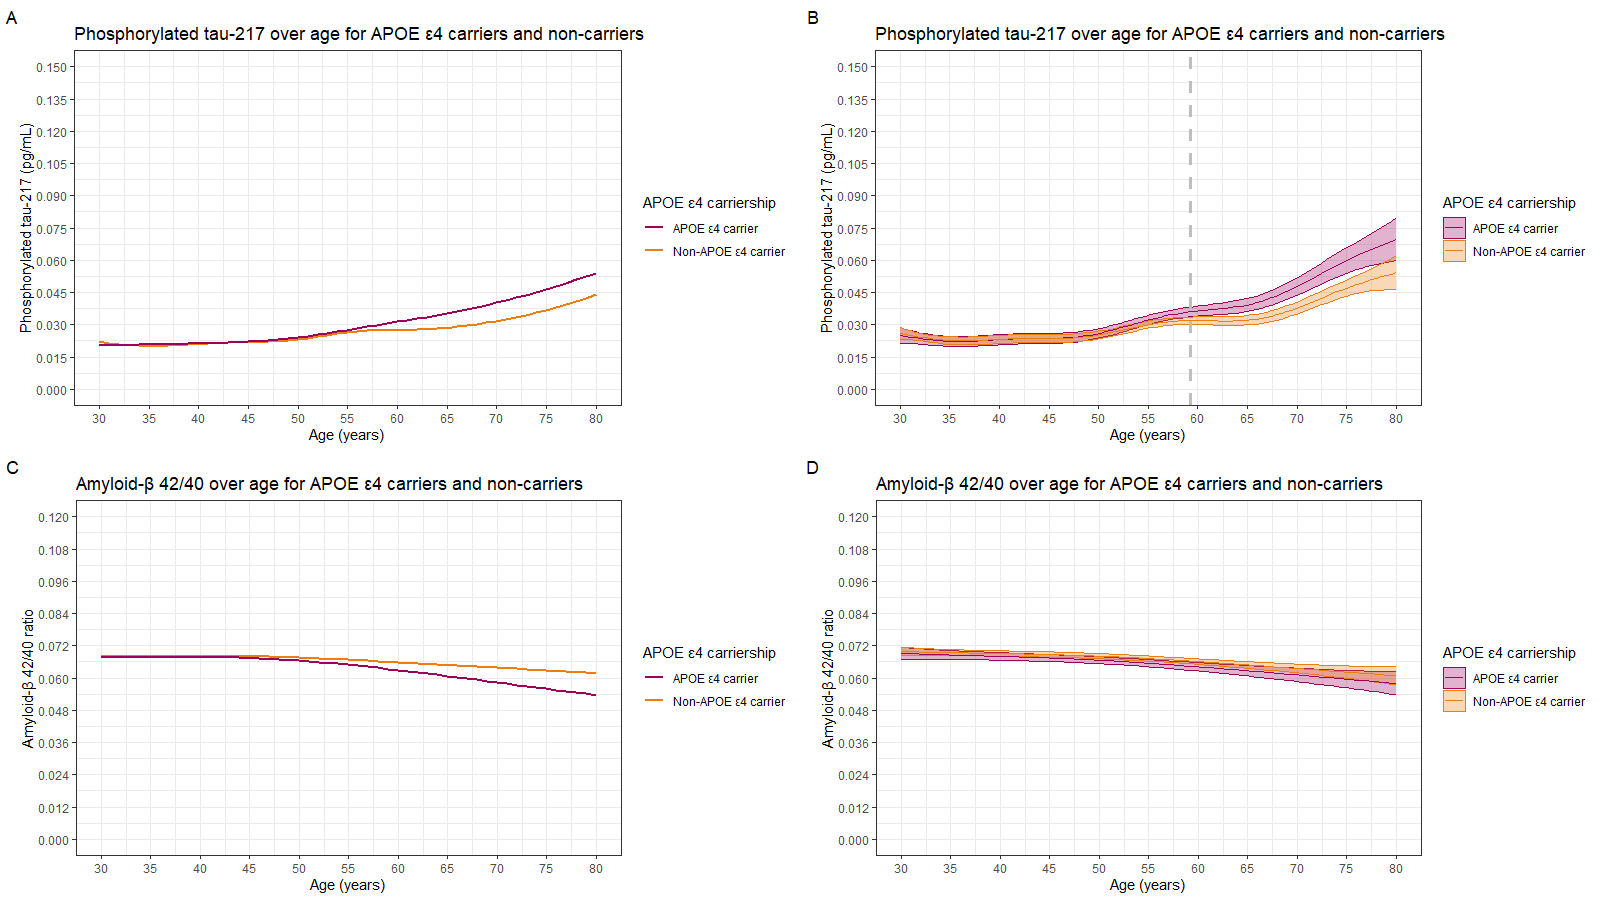


**Figure S5.** Comparison between GAMLSS (left) and GAM (right) approach. The GAMLSS approach was used as the basis for the main results. Grey vertical dashed lines represent the age at which the biomarker concentrations begin to significantly differ between *APOE* ε4 carriers and non-carriers. A and B = Phorphorylated-tau-217 over age. C and D = Amyloid-β-42/40 over age. Results for neurofilament light and glial fibrillary acidic protein are not shown as no differences in concentrations were found between *APOE* ε4 carriers and non-carriers.

| **Table S8. Likelihood ratio test results between age and age by *APOE* interaction models in males and females, with *APOE* as an ordinal variable.** | | | | | | |
| --- | --- | --- | --- | --- | --- | --- |
| ***Biomarker*** | ***Sex*** | ***Predictor*** | ***Deviance*** | ***df*** | ***LRT*** | ***p*** |
| *p-tau217* | Males | Age | -11862.3 | 32.6 |  |  |
| Age + *APOE* | -11874.3 | 34.6 | 12.0 | **0.002** |
| Age + *APOE* + Age * *APOE* | -11912.6 | 41.7 | 38.3 | **< 0.001** |
| Females | Age | -21787.9 | 38.6 |  |  |
| Age + *APOE* | -21799.3 | 40.7 | 11.4 | **0.004** |
| Age + *APOE* + Age * *APOE* | -21813.4 | 46.5 | 14.1 | 0.03 |
| *Aβ-42/40* | Males | Age | -12011.0 | 28.2 |  |  |
| Age + *APOE* | -12026.0 | 30.1 | 15.0 | **< 0.001** |
| Age + *APOE* + Age * *APOE* | -12044.5 | 35.1 | 18.5 | **0.002** |
| Females | Age | -21595.6 | 30.7 |  |  |
| Age + *APOE* | -21607.7 | 32.8 | 12.1 | **0.003** |
| Age + *APOE* + Age * *APOE* | -21638.3 | 38.3 | 20.6 | **0.001** |
| *NfL* | Males | Age | 11095.7 | 37.0 |  |  |
| Age + *APOE* | 11079.7 | 39.1 | 15.9 | **< 0.001** |
| Age + *APOE* + Age * *APOE* | 11072.9 | 46.7 | 6.77 | 0.51 |
| Females | Age | 18517.9 | 43.9 |  |  |
| Age + *APOE* | 18517.3 | 45.9 | 0.67 | 0.71 |
| Age + *APOE* + Age * *APOE* | 18511.0 | 53.9 | 6.29 | 0.62 |
| *GFAP* | Males | Age | 19192.8 | 33.3 |  |  |
| Age + *APOE* | 19190.6 | 35.3 | 2.21 | 0.33 |
| Age + *APOE* + Age * *APOE* | 19171.9 | 42.0 | 18.8 | **0.007** |
| Females | Age | 34336.2 | 37.5 |  |  |
| Age + *APOE* | 34334.8 | 39.5 | 1.45 | 0.50 |
| Age + *APOE* + Age * *APOE* | 34318.5 | 48.7 | 16.2 | 0.07 |

All models include principal components 1 to 20 as additional predictors and are adjusted for body mass index and estimated glomerular filtration rate.

*APOE* is modelled as a binary variable: *APOE* ε4 non-carrier (0), heterozygous *APOE* ε4 carrier (1), or homozygous *APOE* ε4 carrier (2).

The Age + *APOE* model is compared to the Age model. The Age + *APOE* + Age * *APOE* model is compared to the Age + *APOE* model. Age * *APOE* indicates an interaction effect between age and *APOE*.


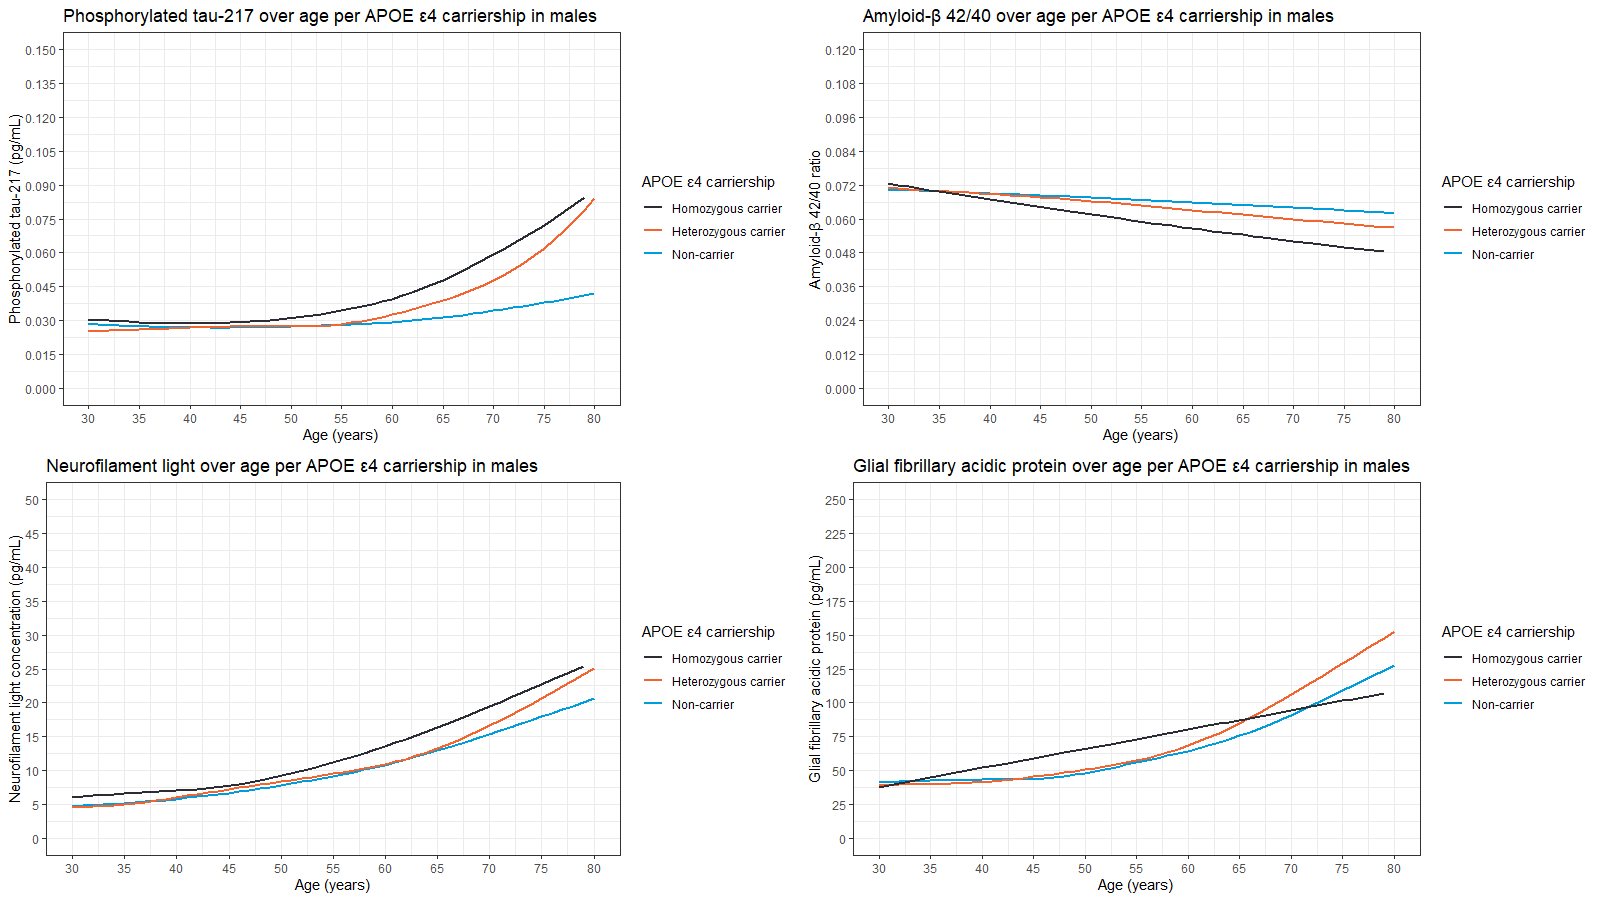


**Figure S6.** Plasma concentrations over age in males, stratified by *APOE* ε4 carriership. A = Phosphorylated-tau-217. B = Amyloid-β-42/40. C = Neurofilament light. D = Glial fibrillary acidic protein.


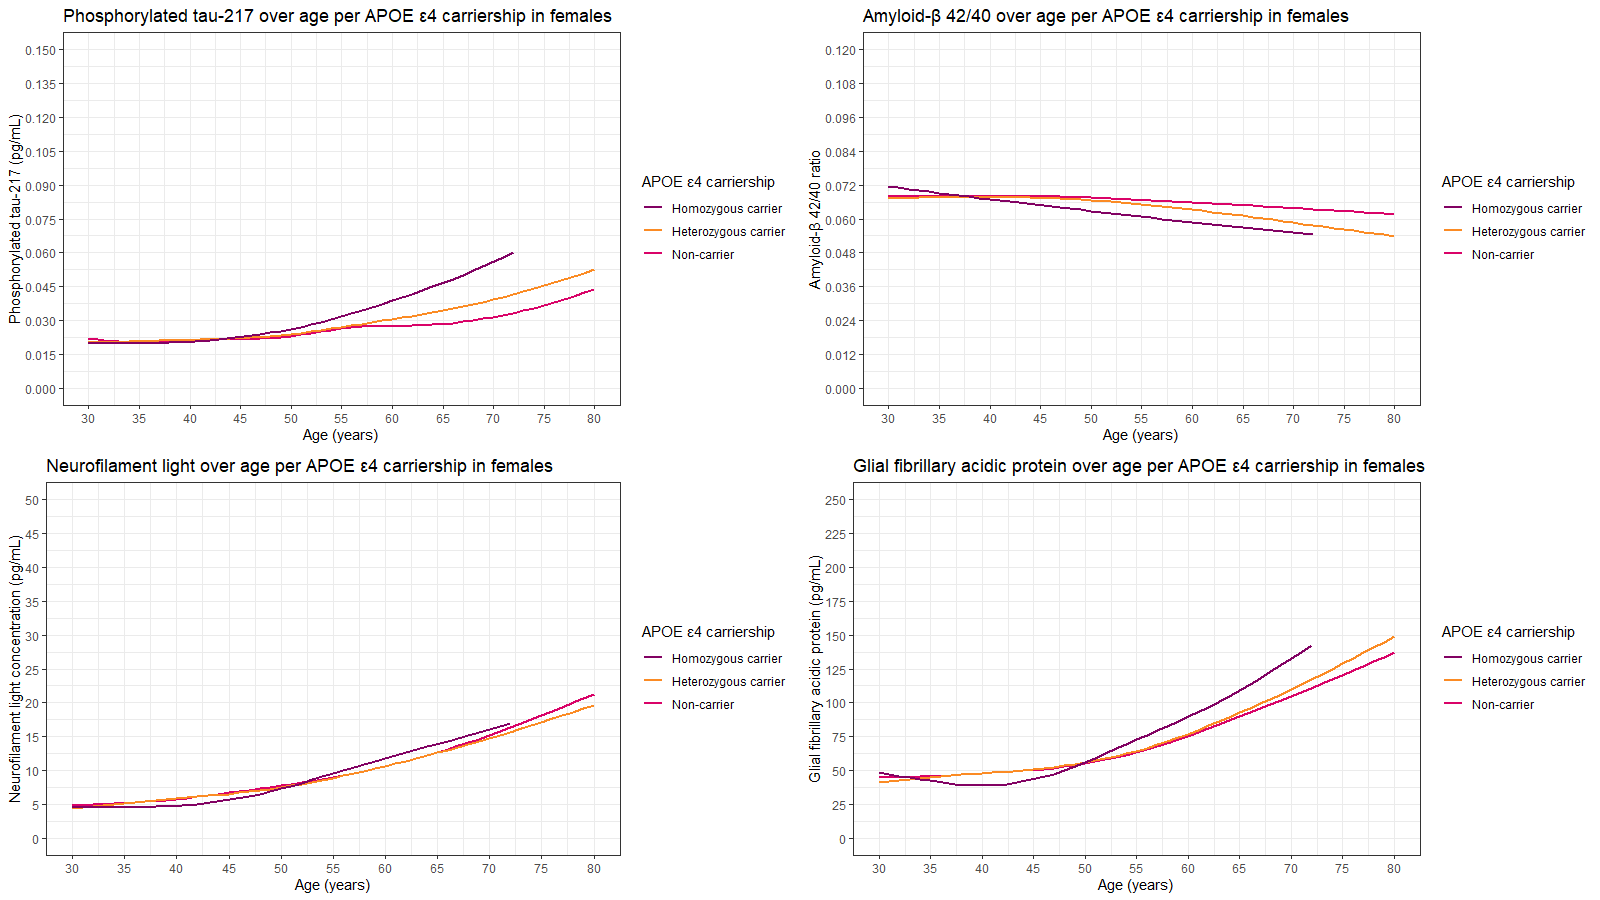


**Figure S7.** Plasma concentrations over age in males, stratified by *APOE* ε4 carriership. A = Phosphorylated-tau-217. B = Amyloid-β-42/40. C = Neurofilament light. D = Glial fibrillary acidic protein.

| **Table S9. Likelihood ratio test results between age and age by PRSAD interaction models, without adjusting for APOE.** | | | | | |
| --- | --- | --- | --- | --- | --- |
| ***Biomarker*** | ***Predictor*** | ***Deviance*** | ***df*** | ***LRT*** | ***p*** |
| *p-tau217* | Age | -33357.0 | 36.4 |  |  |
| Age + PRSAD | -33362.9 | 37.5 | 5.93 | 0.02 |
| Age + PRSAD + Age * PRSAD | -33364.6 | 38.5 | 1.72 | 0.21 |
| *Aβ-42/40* | Age | -33559.7 | 31.1 |  |  |
| Age + PRSAD | -33560.8 | 32.1 | 1.11 | 0.30 |
| Age + PRSAD + Age * PRSAD | -33560.9 | 33.6 | 0.13 | 0.86 |
| *NfL* | Age | 29751.3 | 44.5 |  |  |
| Age + PRSAD | 29749.0 | 45.5 | 2.27 | 0.13 |
| Age + PRSAD + Age * PRSAD | 29749.0 | 46.5 | 0.03 | 0.87 |
| *GFAP* | Age | 53659.1 | 38.5 |  |  |
| Age + PRSAD | 53659.0 | 39.5 | 0.09 | 0.77 |
| Age + PRSAD + Age * PRSAD | 53657.7 | 40.7 | 1.28 | 0.30 |

All models include principal components 1 to 20 as additional predictors and are adjusted for body mass index and estimated glomerular filtration rate.

PRSAD is modelled as an ordinal variable: low AD genetic risk (0), medium AD genetic risk (1), high AD genetic risk (2).

The Age + PRSAD model is compared to the Age model. The Age + PRSAD + Age * PRSAD model is compared to the Age + PRSAD model. Age * PRSAD indicates an interaction effect between age and PRSAD.

| **Table S10. Likelihood ratio test results between age and age by PRSAD interaction models, adjusting for *APOE*.** | | | | | |
| --- | --- | --- | --- | --- | --- |
| ***Biomarker*** | ***Predictor*** | ***Deviance*** | ***df*** | ***LRT*** | ***p*** |
| *p-tau217* | Age + *APOE* | -33374.44 | 37.5 |  |  |
| Age + *APOE* + PRSAD | -33379.8 | 38.5 | 5.37 | 0.02 |
| Age + *APOE* + PRSAD + Age * PRSAD | -33381.4 | 39.6 | 1.61 | 0.22 |
| *Aβ-42/40* | Age + *APOE* | -33579.7 | 32.2 |  |  |
| Age + *APOE* + PRSAD | -33580.6 | 33.3 | 0.97 | 0.33 |
| Age + *APOE* + PRSAD + Age * PRSAD | -33580.8 | 34.8 | 0.18 | 0.84 |
| *NfL* | Age + *APOE* | 29751.2 | 45.5 |  |  |
| Age + *APOE* + PRSAD | 29749.0 | 46.5 | 2.27 | 0.13 |
| Age + *APOE* + PRSAD + Age * PRSAD | 29749.0 | 47.5 | 0.03 | 0.87 |
| *GFAP* | Age + *APOE* | 53657.8 | 39.5 |  |  |
| Age + *APOE* + PRSAD | 53657.7 | 40.5 | 0.10 | 0.75 |
| Age + *APOE* + PRSAD + Age * PRSAD | 53656.5 | 41.6 | 1.21 | 0.30 |

All models include principal components 1 to 20 as additional predictors and are adjusted for body mass index and estimated glomerular filtration rate.

PRSAD is modelled as an ordinal variable: low AD genetic risk (0), medium AD genetic risk (1), high AD genetic risk (2).

The Age + *APOE* + PRSAD model is compared to the Age + *APOE* model. The Age + *APOE* + PRSAD + Age * PRSAD model is compared to the Age + *APOE* + PRSAD model. Age * PRSAD indicates an interaction effect between age and PRSAD.

| **Table S11. Likelihood ratio test results between age and age by PRSAD interaction models in males and females, without adjusting for *APOE*.** | | | | | | |
| --- | --- | --- | --- | --- | --- | --- |
| ***Biomarker*** | ***Sex*** | ***Predictor*** | ***Deviance*** | ***df*** | ***LRT*** | ***p*** |
| *p-tau217* | Males | Age | -11862.3 | 32.6 |  |  |
| Age + PRSAD | -11874.6 | 33.5 | 12.3 | **< 0.001** |
| Age + PRSAD + Age * PRSAD | -11877.9 | 35.6 | 3.30 | 0.20 |
| Females | Age | -21767.9 | 38.6 |  |  |
| Age + PRSAD | -21788.1 | 39.6 | 0.19 | 0.66 |
| Age + PRSAD + Age * PRSAD | -21790.7 | 40.6 | 0.70 | 0.46 |
| *Aβ-42/40* | Males | Age | -12011.0 | 28.2 |  |  |
| Age + PRSAD | -12016.3 | 29.2 | 5.37 | 0.02 |
| Age + PRSAD + Age * PRSAD | -12016.4 | 30.4 | 0.09 | 0.83 |
| Females | Age | -21595.6 | 30.7 |  |  |
| Age + PRSAD | -21595.8 | 31.7 | 0.19 | 0.66 |
| Age + PRSAD + Age * PRSAD | -21596.5 | 32.9 | 0.70 | 0.46 |
| *NfL* | Males | Age | 11095.7 | 37.0 |  |  |
| Age + PRSAD | 11090.8 | 38.0 | 4.83 | 0.03 |
| Age + PRSAD + Age * PRSAD | 11085.7 | 39.1 | 5.11 | 0.03 |
| Females | Age | 18517.9 | 43.9 |  |  |
| Age + PRSAD | 18517.9 | 44.9 | 0.08 | 0.78 |
| Age + PRSAD + Age * PRSAD | 18515.6 | 45.9 | 2.25 | 0.14 |
| *GFAP* | Males | Age | 19192.8 | 33.3 |  |  |
| Age + PRSAD | 19191.6 | 34.3 | 1.23 | 0.27 |
| Age + PRSAD + Age * PRSAD | 19191.6 | 35.3 | 0.05 | 0.82 |
| Females | Age | 34336.2 | 37.5 |  |  |
| Age + PRSAD | 34335.6 | 38.5 | 0.64 | 0.43 |
| Age + PRSAD + Age * PRSAD | 34333.1 | 39.4 | 2.53 | 0.11 |

All models include principal components 1 to 20 as additional predictors and are adjusted for body mass index and estimated glomerular filtration rate.

PRSAD is modelled as an ordinal variable: low AD genetic risk (0), medium AD genetic risk (1), high AD genetic risk (2).

The Age + PRSAD model is compared to the Age model. The Age + PRSAD + Age * PRSAD model is compared to the Age + PRSAD model. Age * PRSAD indicates an interaction effect between age and PRSAD.

§A p-value could not be computer because the deviance of the alternative model is larger than the deviance of the null model.

| **Table S12. Likelihood ratio test results between age and age by PRSAD interaction models in males and females, adjusting for *APOE*.** | | | | | | |
| --- | --- | --- | --- | --- | --- | --- |
| ***Biomarker*** | ***Sex*** | ***Predictor*** | ***Deviance*** | ***df*** | ***LRT*** | ***p*** |
| *p-tau217* | Males | Age + *APOE* | -11869.2 | 33.6 |  |  |
| Age + *APOE* + PRSAD | -11881.0 | 34.5 | 11.8 | **< 0.001** |
| Age + *APOE* + PRSAD + Age * PRSAD | -11883.9 | 36.5 | 2.93 | 0.22 |
| Females | Age + *APOE* | -21796.4 | 39.6 |  |  |
| Age + *APOE* + PRSAD | -21796.6 | 40.6 | 0.14 | 0.71 |
| Age + *APOE* + PRSAD + Age * PRSAD | -21799.2 | 41.7 | 2.66 | 0.12 |
| *Aβ-42/40* | Males | Age + *APOE* | -12021.5 | 29.2 |  |  |
| Age + *APOE* + PRSAD | -12026.7 | 30.2 | 5.13 | 0.02 |
| Age + *APOE* + PRSAD + Age * PRSAD | -12026.7 | 31.3 | 0.03 | 0.90 |
| Females | Age + *APOE* | -21606.4 | 31.8 |  |  |
| Age + *APOE* + PRSAD | -21606.7 | 32.8 | 0.24 | 0.62 |
| Age + *APOE* + PRSAD + Age * PRSAD | -21607.3 | 34.1 | 0.65 | 0.51 |
| *NfL* | Males | Age + *APOE* | 11093.8 | 38.0 |  |  |
| Age + *APOE* + PRSAD | 11088.8 | 39.0 | 4.96 | 0.03 |
| Age + *APOE* + PRSAD + Age * PRSAD | 11083.5 | 40.1 | 5.35 | 0.02 |
| Females | Age + *APOE* | 18517.3 | 44.9 |  |  |
| Age + *APOE* + PRSAD | 18517.2 | 45.9 | 0.08 | 0.77 |
| Age + *APOE* + PRSAD + Age * PRSAD | 18515.0 | 46.9 | 2.24 | 0.14 |
| *GFAP* | Males | Age + *APOE* | 19192.3 | 34.3 |  |  |
| Age + *APOE* + PRSAD | 19191.0 | 35.3 | 1.23 | 0.27 |
| Age + *APOE* + PRSAD + Age * PRSAD | 19191.0 | 36.3 | 0.06 | 0.80 |
| Females | Age + *APOE* | 34335.7 | 38.4 |  |  |
| Age + *APOE* + PRSAD | 34335.0 | 39.5 | 0.68 | 0.41 |
| Age + *APOE* + PRSAD + Age * PRSAD | 34332.4 | 40.4 | 2.57 | 0.11 |

All models include principal components 1 to 20 as additional predictors and are adjusted for body mass index and estimated glomerular filtration rate.

PRSAD is modelled as an ordinal variable: low AD genetic risk (0), medium AD genetic risk (1), high AD genetic risk (2).

The Age + *APOE* + PRSAD model is compared to the Age + *APOE* model. The Age + *APOE* + PRSAD + Age * PRSAD model is compared to the Age + *APOE* + PRSAD model. Age * PRSAD indicates an interaction effect between age and PRSAD.


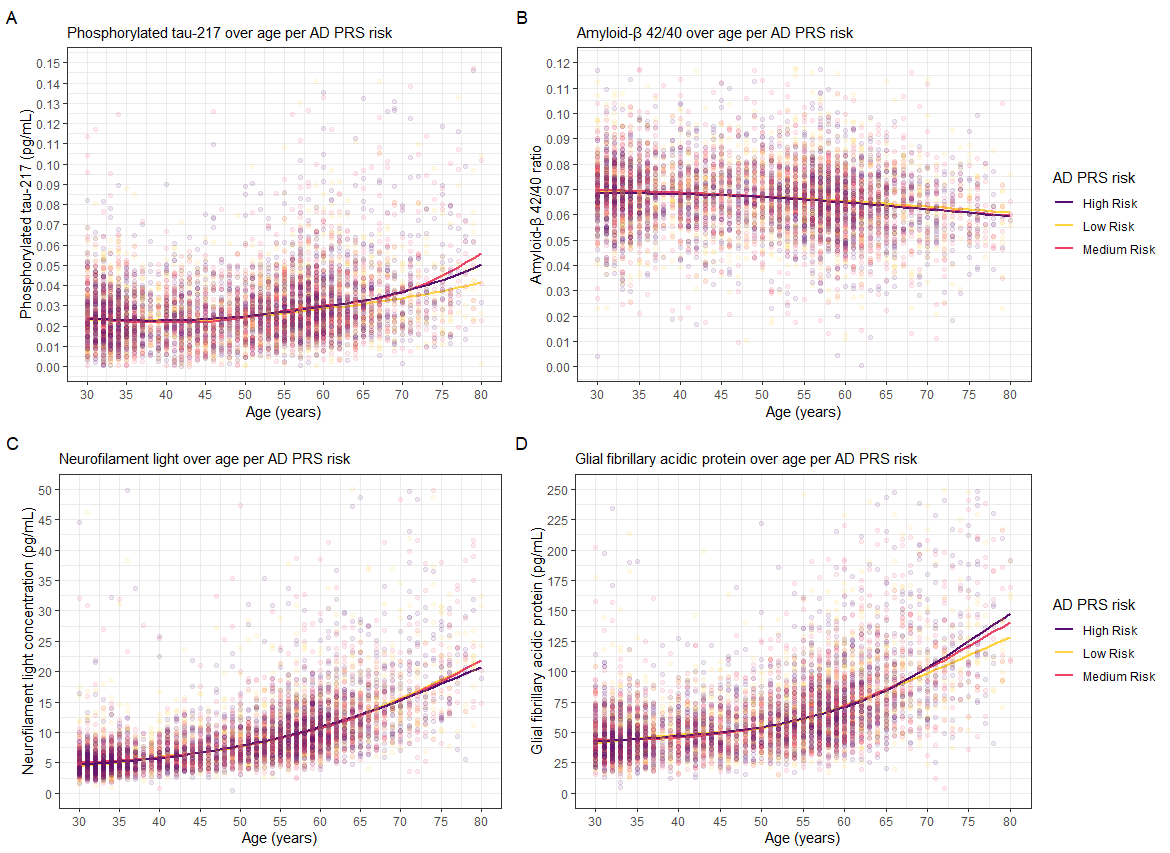


**Figure S8.** Concentrations of plasma p-tau217 (A), Aβ-42/40 (B), NfL (C), and GFAP (D) over age, stratified by AD genetic risk as defined by the AD polygenic risk score.


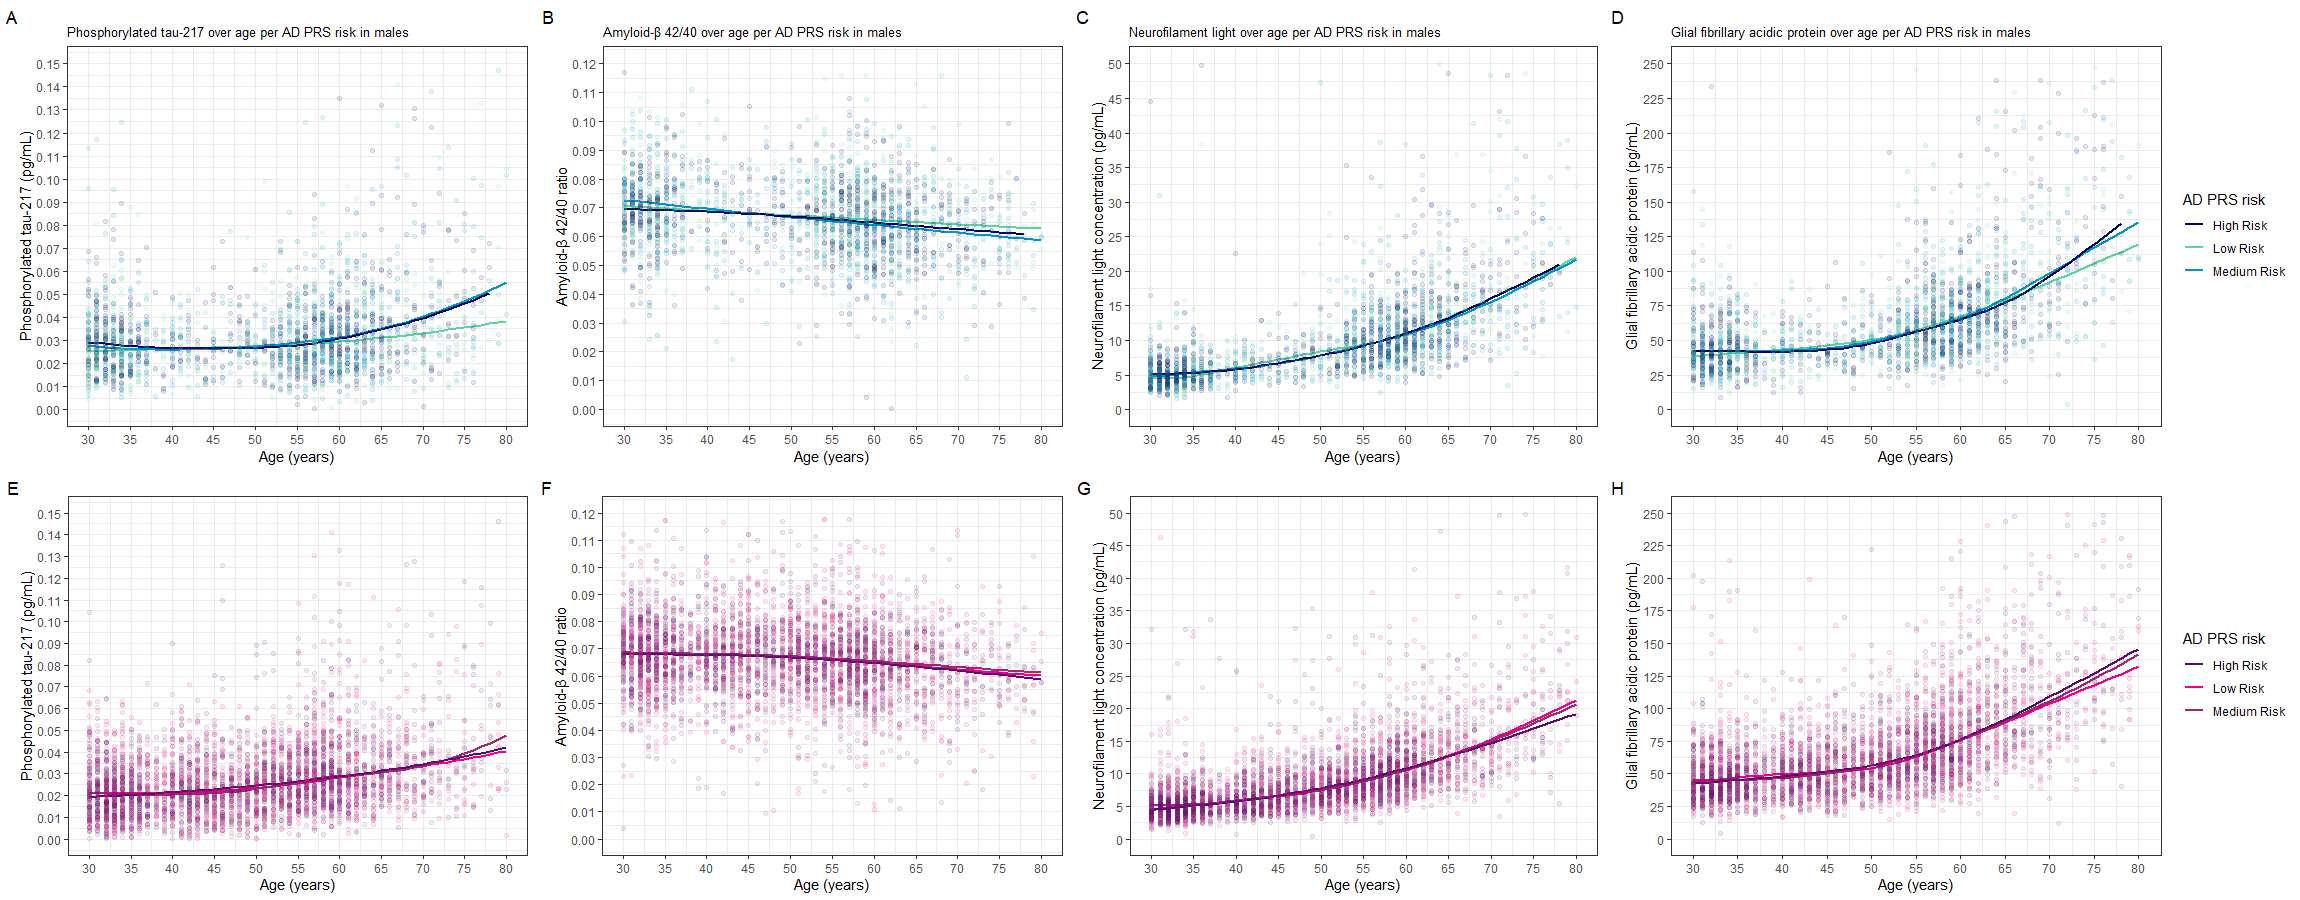


**Figure S9.** Concentrations of plasma p-tau217, Aβ-42/40, NfL, and GFAP over age in males (top panels) and females (bottom panels), stratified by AD genetic risk as defined by the AD polygenic risk score.. A = p-tau217 in males; B = Aβ-42/40 in males; C = NfL in males; D = GFAP in males; E = p-tau217 in females; F = Aβ-42/40 in females; G = NfL in females; H = GFAP in females.

| **Table S13. Comparison of *APOE* ε4 carriership LMMs in the EMIF-AD cohort.** | | | | | | |
| --- | --- | --- | --- | --- | --- | --- |
| *Biomarkers* | *Group 1* | *Group 2* | *β intercept (age 60)* | *p Intercept* | *β slope* | *p slope* |
| p-tau217 | Non-carrier | ε4 carrier | -0.48 (0.13) | **< 0.001** | 0.006 (0.008) | 0.49 |
| Aβ-42/40 | Non-carrier | ε4 carrier | -0.009 (0.07) | 0.90 | 0.005 (0.004) | 0.14 |
| NfL | Non-carrier | ε4 carrier | 0.20 (0.11) | 0.07 | -0.02 (0.001) | **0.001** |
| GFAP | Non-carrier | ε4 carrier | -0.14 (0.12) | 0.25 | -0.008 (0.005) | 0.15 |

Aβ-42/40: amyloid-β-42/40; GFAP: glial fibrillary acidic protein; NfL: neurofilament light; p-tau217: phosphorylated tau-217.

| **Table S14. Comparison of *APOE* ε4 carriership and Aβ PET LMMs in the EMIF-AD cohort.** | | | | | | |
| --- | --- | --- | --- | --- | --- | --- |
| *Biomarkers* | *Group 1* | *Group 2* | *β intercept (age 60)* | *p Intercept* | *β slope* | *p slope* |
| p-tau217 | PET negative, non-carrier | PET positive, non-carrier | 0.45 (0.22) | 0.16 | -0.07 (0.01) | **< 0.001** |
| PET negative, non-carrier | PET negative, ε4 carrier | -0.38 (0.13) | 0.03 | 0.02 (0.01) | 0.07 |
| PET negative, non-carrier | PET positive, ε4 carrier | -0.63 (0.14) | **< 0.001** | -0.03 (0.01) | **0.01** |
| PET positive, non-carrier | PET negative, ε4 carrier | -0.83 (0.24) | **0.003** | 0.09 (0.01) | **< 0.001** |
| PET positive, non-carrier | PET positive, ε4 carrier | -1.08 (0.24) | **< 0.001** | 0.04 (0.01) | 0.07 |
| PET negative, ε4 carrier | PET positive, ε4 carrier | -0.25 (0.13) | 0.19 | -0.05 (0.01) | **< 0.001** |
| Aβ-42/40 | PET negative, non-carrier | PET positive, non-carrier | 0.25 (0.13) | 0.19 | -0.007 (0.007) | 0.69 |
| PET negative, non-carrier | PET negative, ε4 carrier | -0.05 (0.07) | 0.88 | 0.004 (0.004) | 0.77 |
| PET negative, non-carrier | PET positive, ε4 carrier | 0.10 (0.08) | 0.62 | 0.007 (0.005) | 0.39 |
| PET positive, non-carrier | PET negative, ε4 carrier | -0.31 (0.14) | 0.11 | 0.01 (0.007) | 0.38 |
| PET positive, non-carrier | PET positive, ε4 carrier | -0.15 (0.14) | 0.70 | 0.02 (0.007) | 0.20 |
| PET negative, ε4 carrier | PET positive, ε4 carrier | 0.15 (0.09) | 0.32 | 0.003 (0.005) | 0.94 |
| NfL | PET negative, non-carrier | PET positive, non-carrier | 0.40 (0.19) | 0.14 | -0.02 (0.01) | 0.29 |
| PET negative, non-carrier | PET negative, ε4 carrier | 0.25 (0.11) | 0.11 | -0.02 (0.007) | **0.002** |
| PET negative, non-carrier | PET positive, ε4 carrier | 0.12 (0.12) | 0.75 | -0.01 (0.007) | 0.36 |
| PET positive, non-carrier | PET negative, ε4 carrier | -0.15 (0.20) | 0.89 | -0.006 (0.01) | 0.95 |
| PET positive, non-carrier | PET positive, ε4 carrier | -0.28 (0.21) | 0.53 | 0.007 (0.01) | 0.94 |
| PET negative, ε4 carrier | PET positive, ε4 carrier | -0.13 (0.11) | 0.64 | 0.01 (0.008) | 0.40 |
| GFAP | PET negative, non-carrier | PET positive, non-carrier | 0.03 (0.18) | > 0.99 | -0.01 (0.01) | 0.77 |
| PET negative, non-carrier | PET negative, ε4 carrier | -0.02 (0.12) | > 0.99 | -0.005 (0.007) | 0.90 |
| PET negative, non-carrier | PET positive, ε4 carrier | -0.35 (0.13) | 0.04 | -0.01 (0.007) | 0.19 |
| PET positive, non-carrier | PET negative, ε4 carrier | -0.05 (0.21) | > 0.99 | 0.005 (0.01) | 0.97 |
| PET positive, non-carrier | PET positive, ε4 carrier | -0.38 (0.21) | 0.28 | -0.005 (0.01) | 0.98 |
| PET negative, ε4 carrier | PET positive, ε4 carrier | -0.33 (0.11) | 0.03 | -0.01 (0.008) | 0.60 |

Beta estimates are based on log2 transformed data.


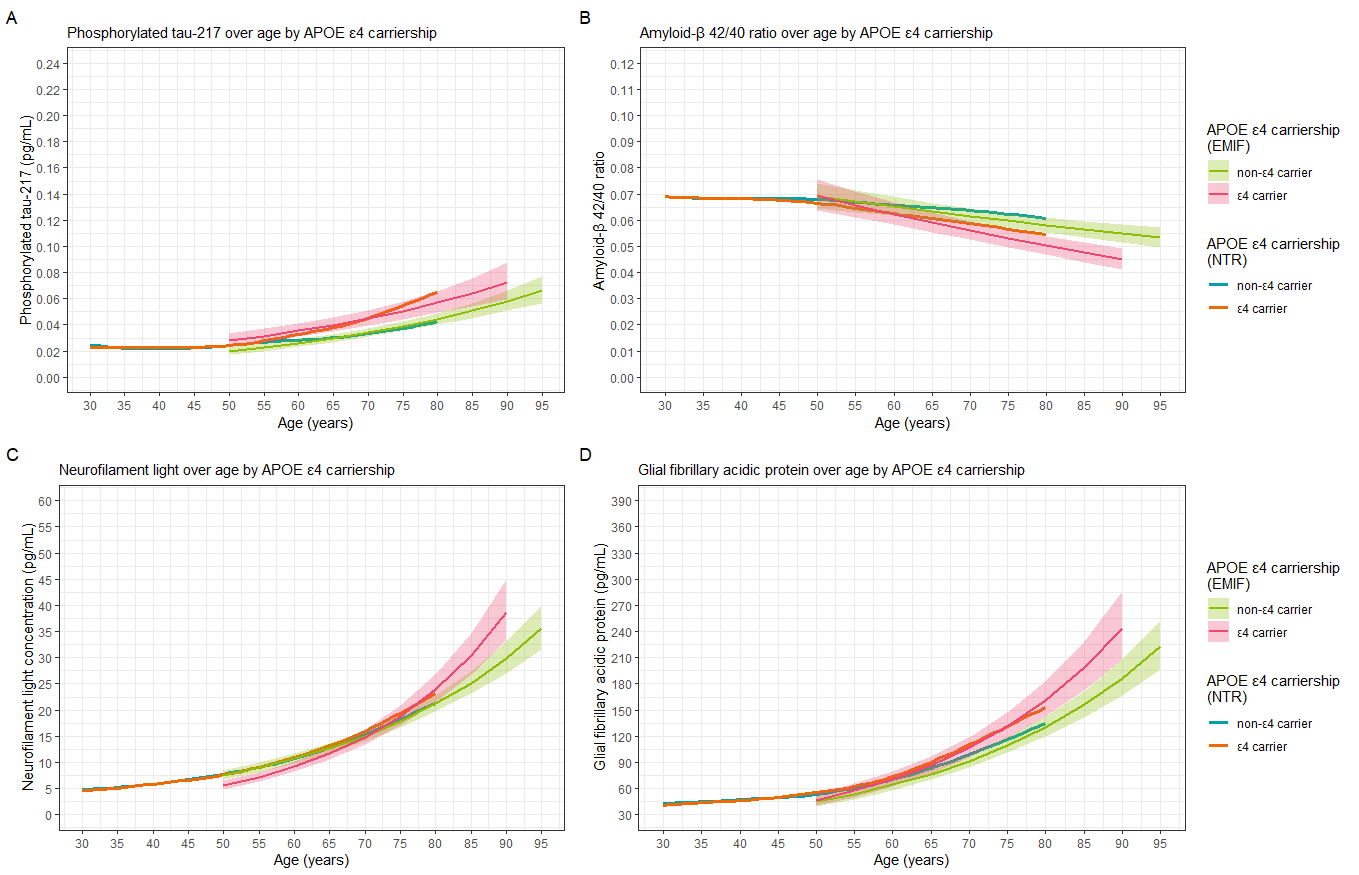


**Figure S10.** Biomarker concentrations over age in the NTR cohort and EMIF-AD sub-cohort, stratified by *APOE* ε4 carriership and including confidence intervals for the EMID-AD cohort. A: p-tau217. B: Aβ-42/40. C: NfL. D: GFAP.


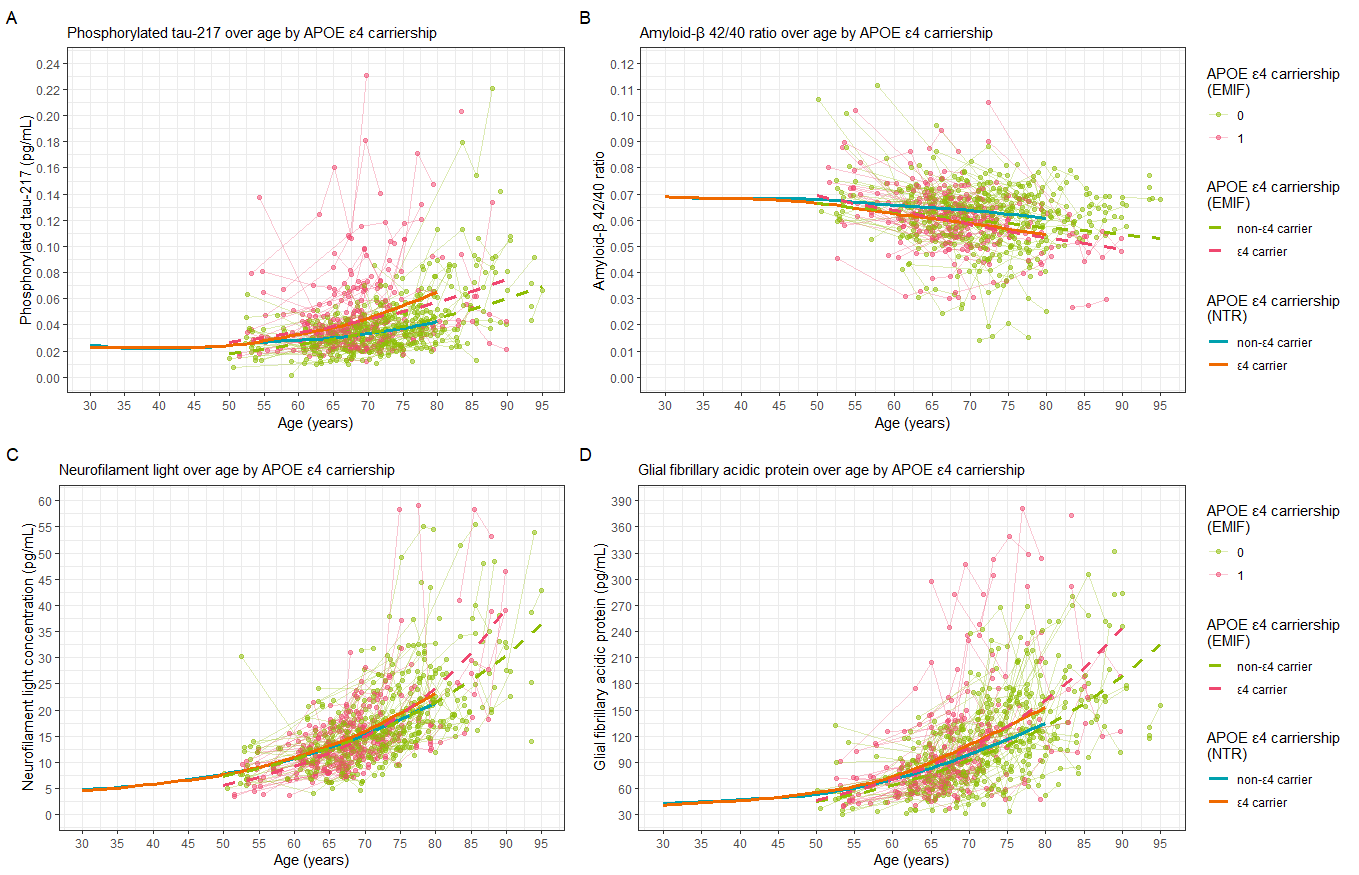


**Figure S11.** Biomarker concentrations over age in the NTR cohort and EMIF-AD sub-cohort, stratified by *APOE* ε4 carriership and showing the underlying longitudinal trajectories for the EMID-AD cohort. A: p-tau217. B: Aβ-42/40. C: NfL. D: GFAP.


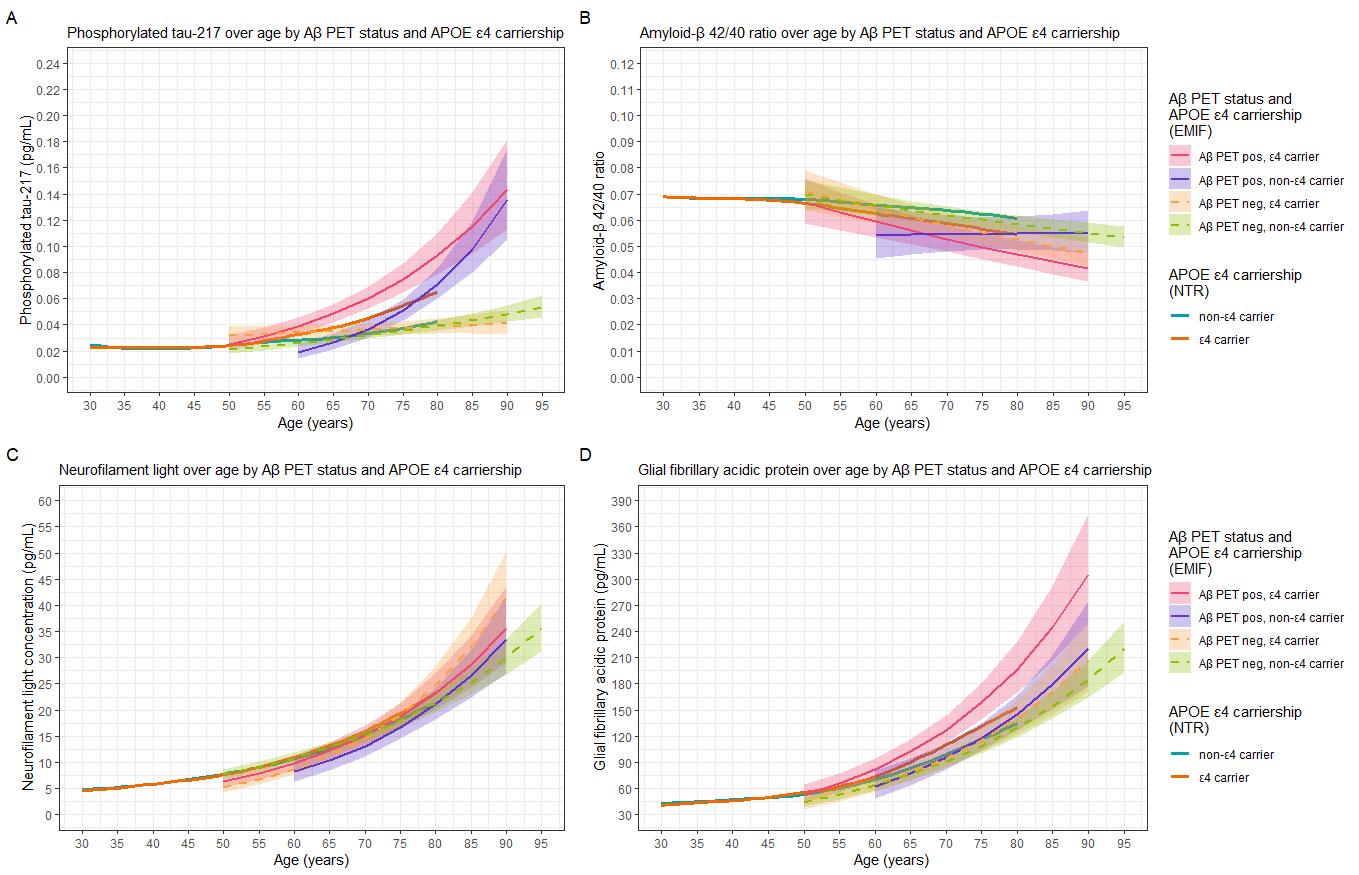


**Figure S12.** Biomarker concentrations over age in the NTR cohort and EMIF-AD sub-cohort, stratified by *APOE* ε4 carriership and Aβ status (EMIF-AD only) and including confidence intervals for the EMID-AD cohort. A: p-tau217. B: Aβ-42/40. C: NfL. D: GFAP.


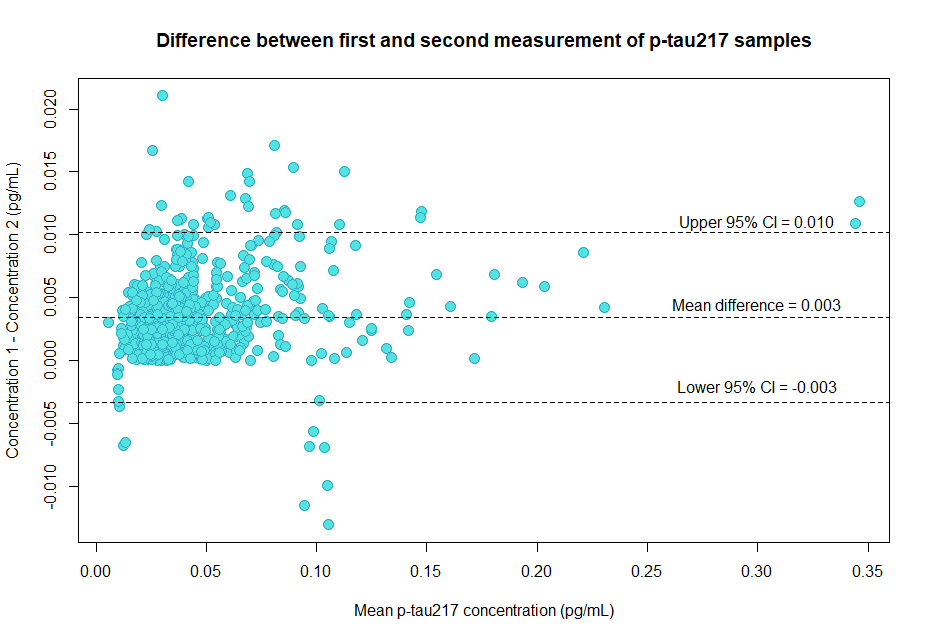


**Figure S13.** Bland-Altman plot of the difference between the first and second duplicate measurements of p-tau217. The x-axis shows the mean concentrations of the first and second measurement of each sample. The y-axis shows the difference between the first and second concentration. The mean difference in concentrations was 0.003 pg/mL (95% CI = -0.003 – 0.010).

| 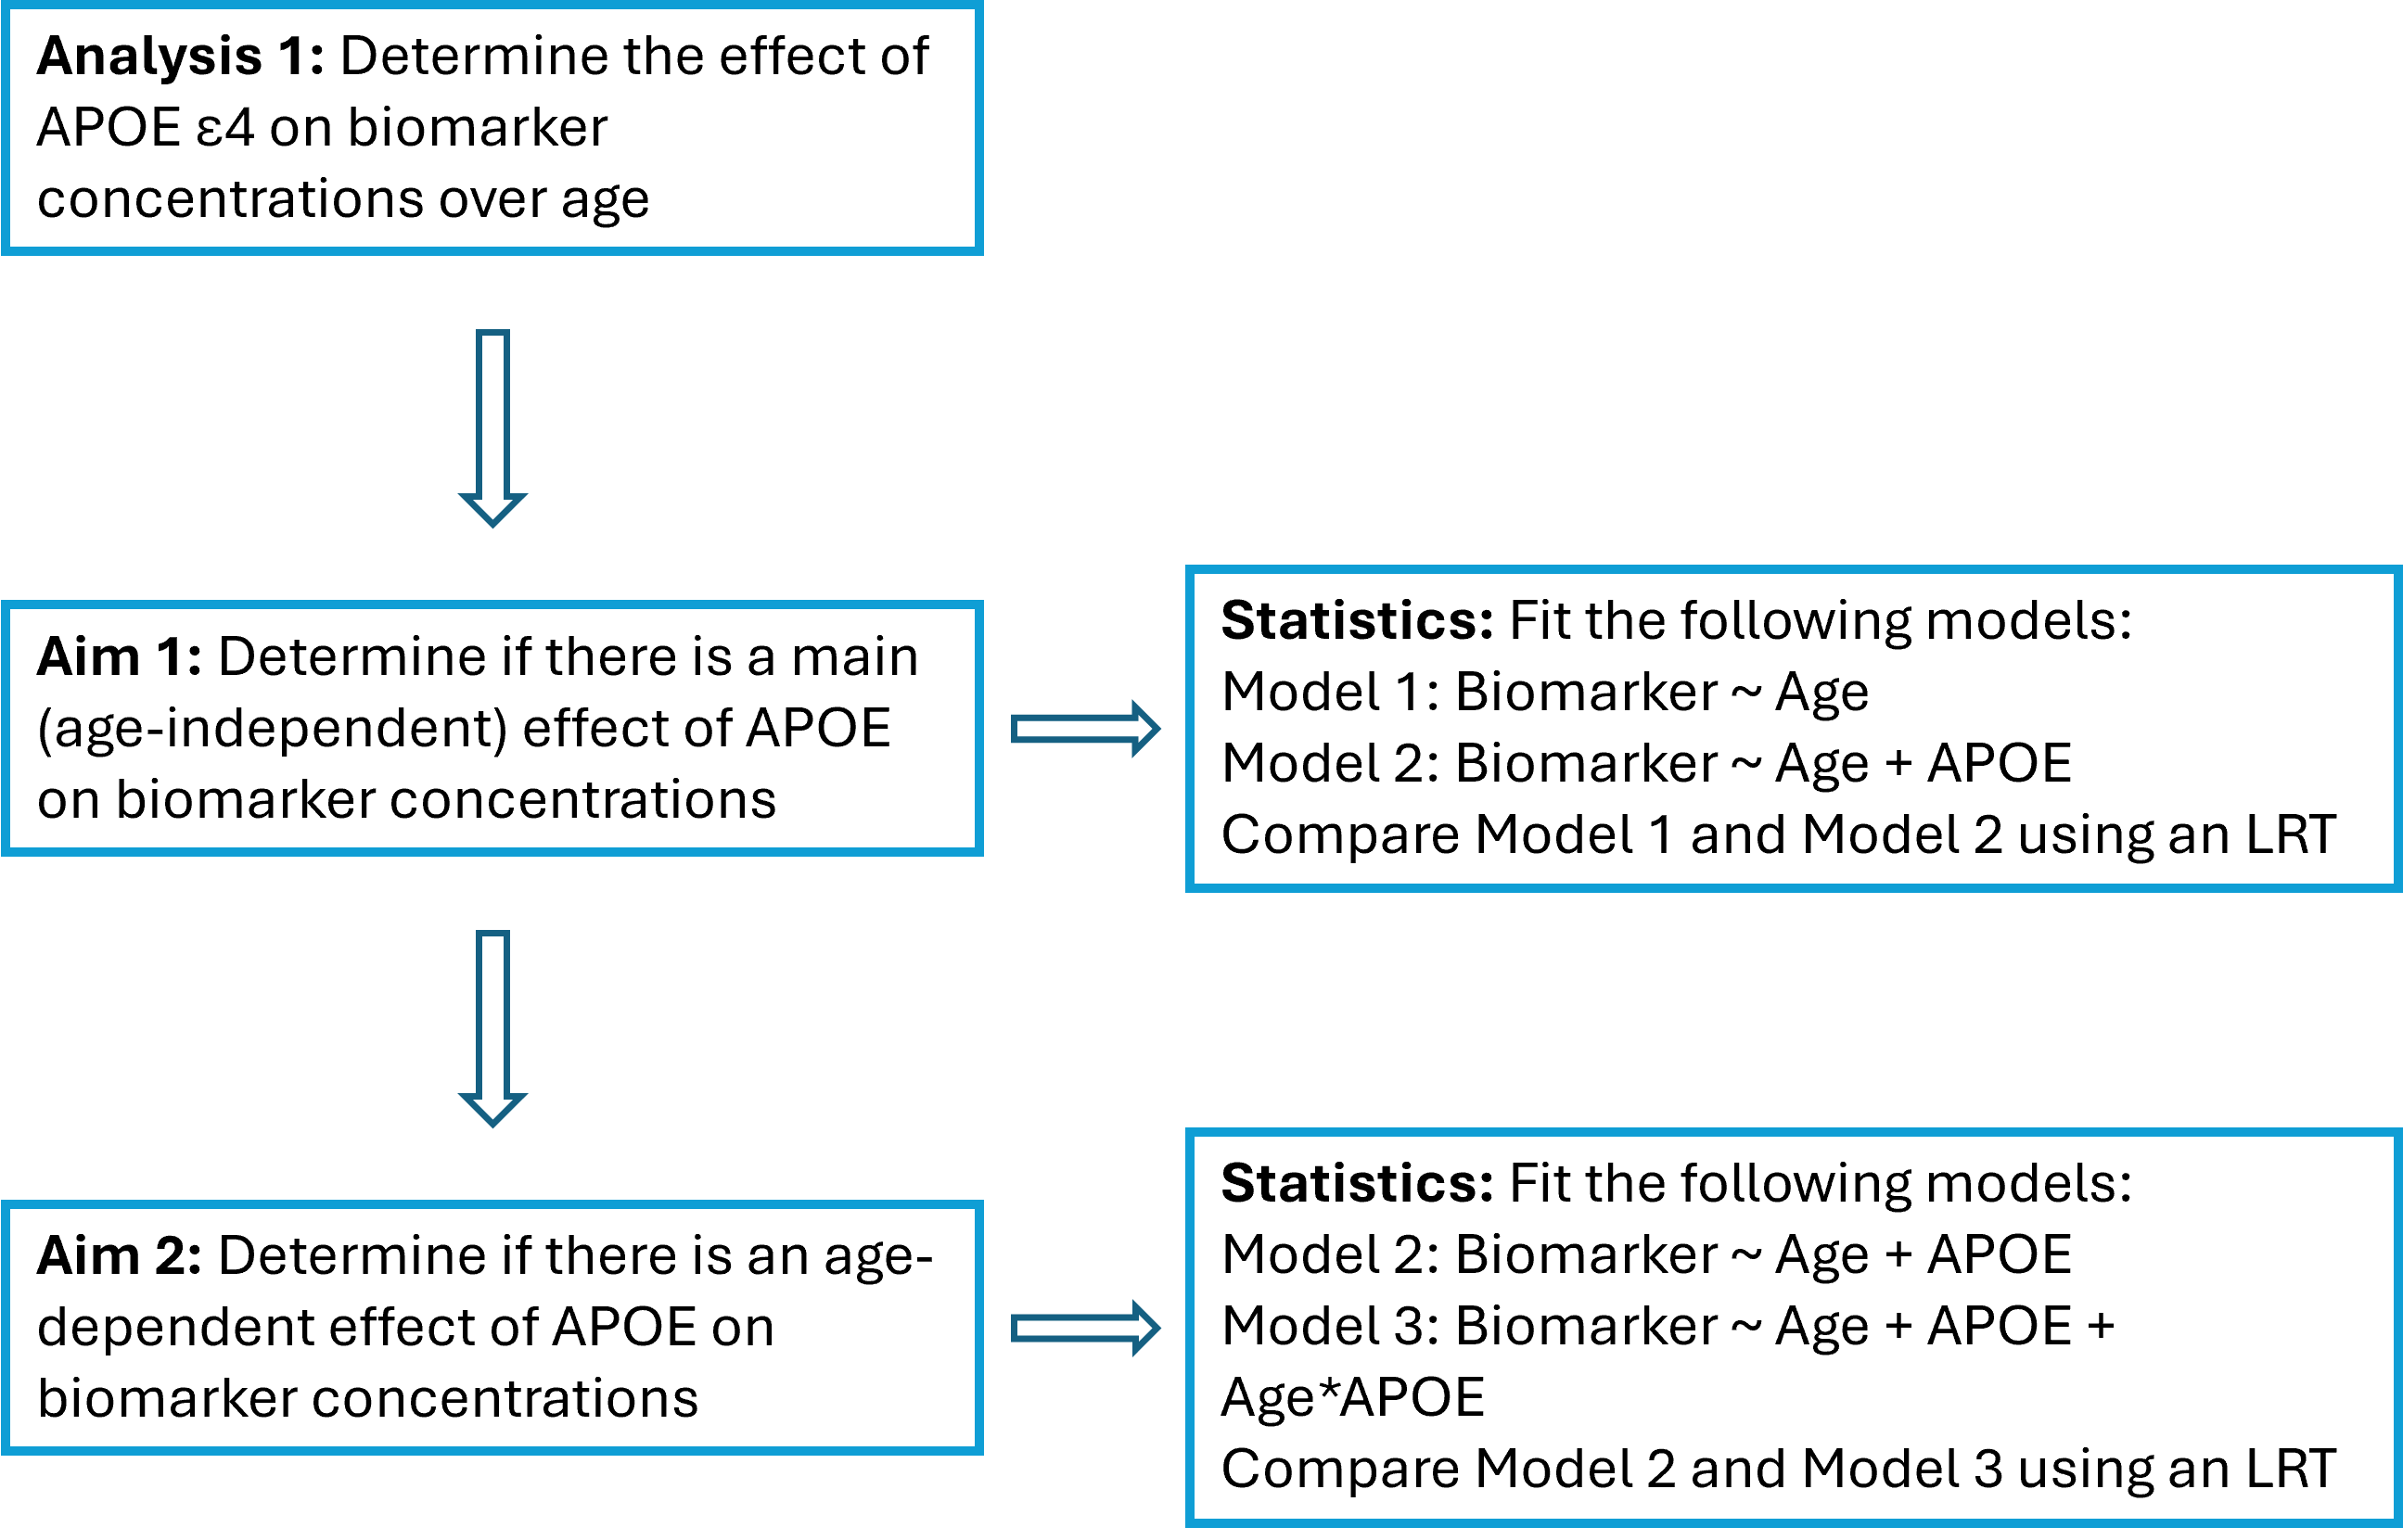 |
| --- |
| 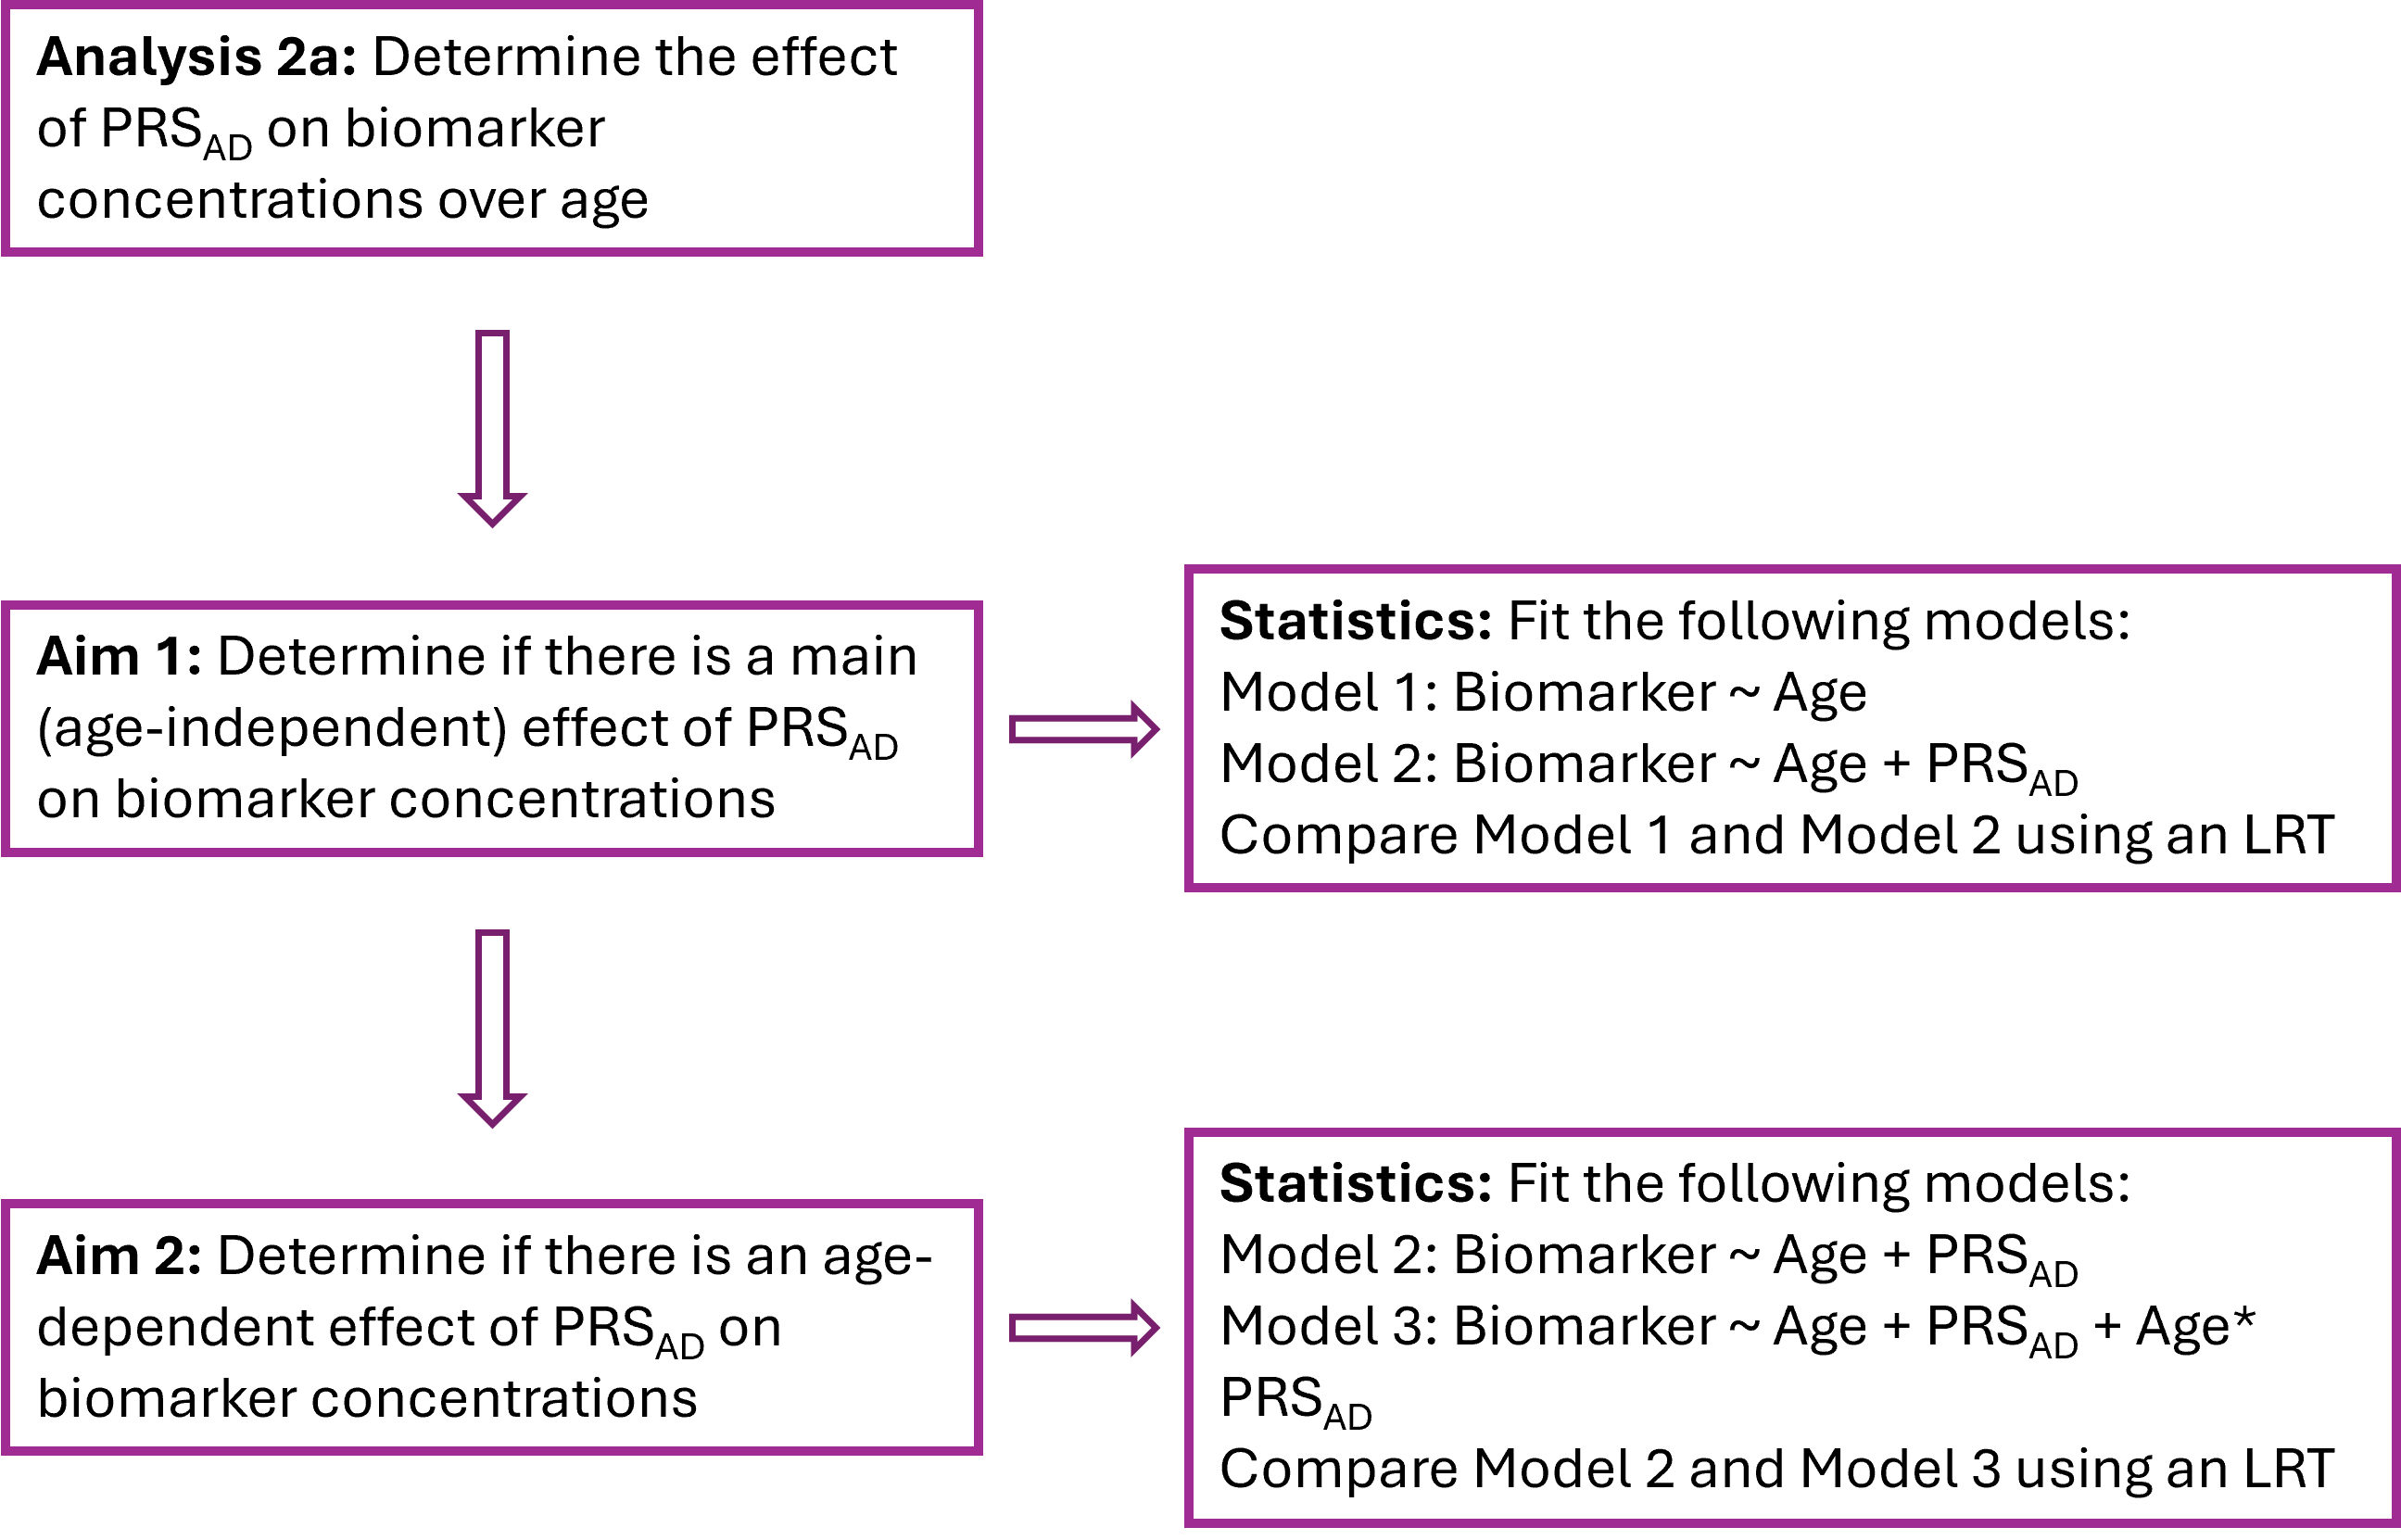 |
| 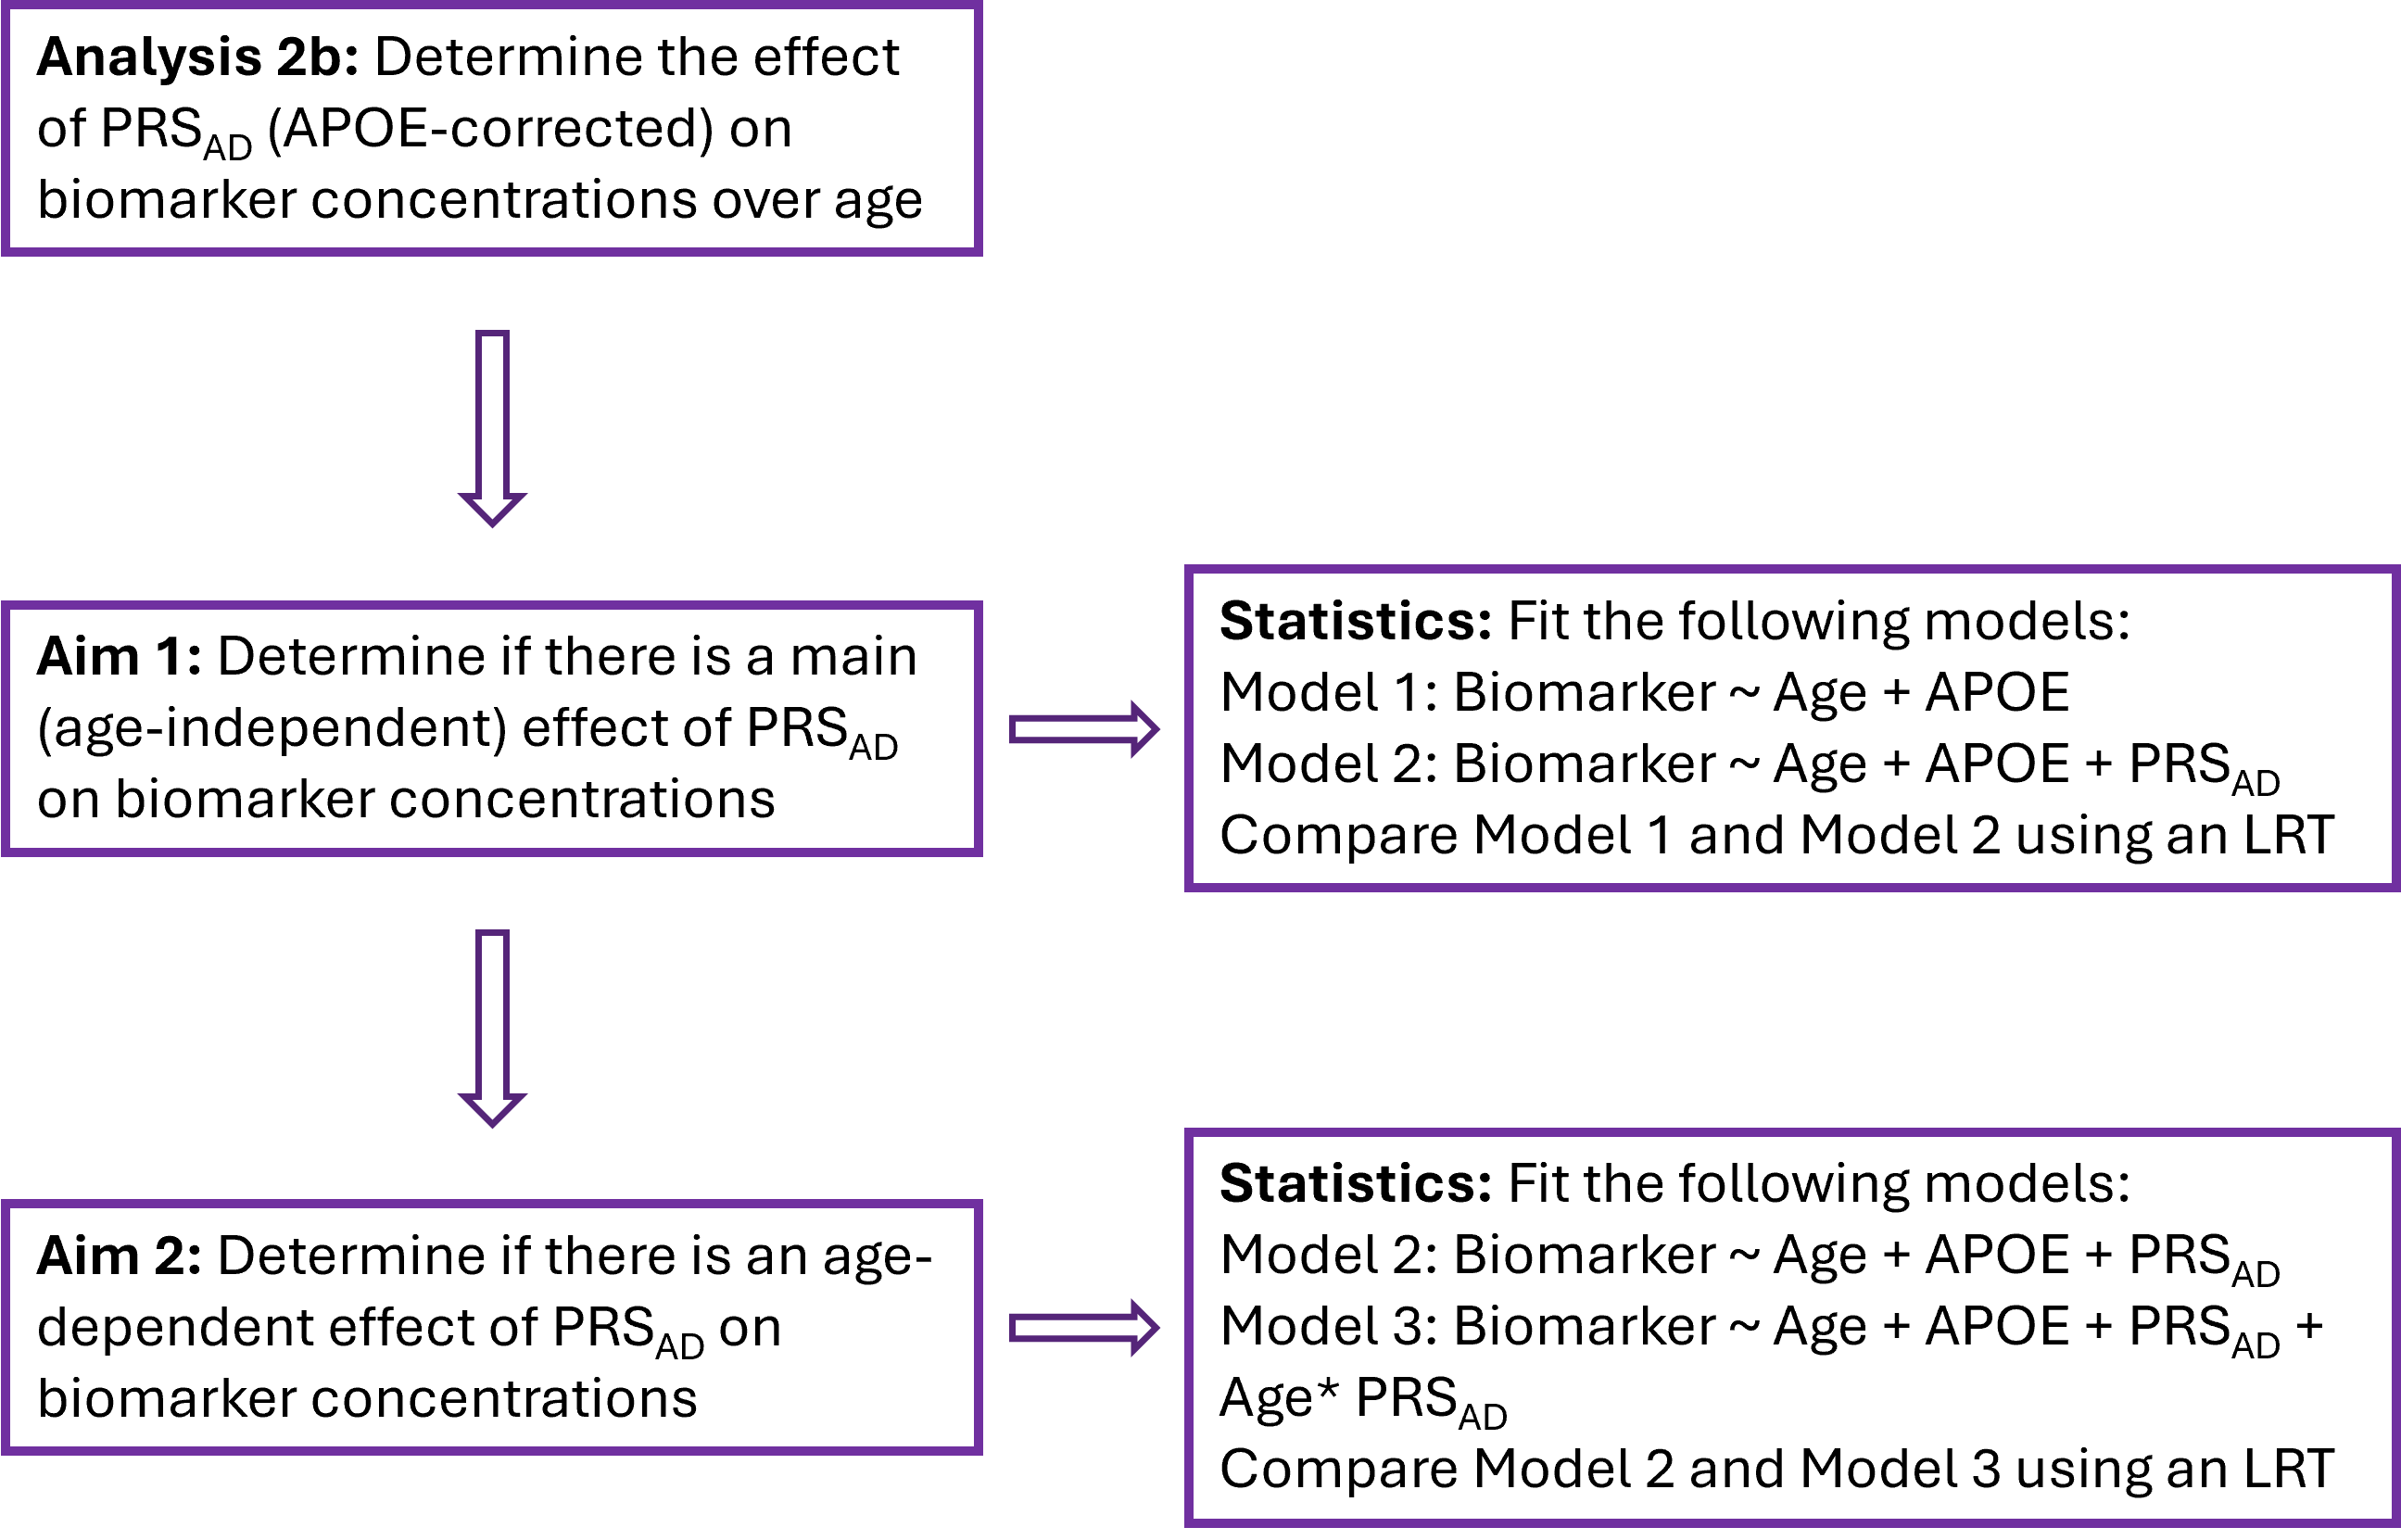 |

**Figure S14.** Overview of the main aims and statistical tests in the main cohort. Each analysis (1, 2a, 2b) was first performed in the entire cohort, and then in sex-specific subsets (male only subset and female only subset).
